# Supplementary material for: Abbreviated Antiplatelet Therapy in Patients at High Bleeding Risk With or Without Oral Anticoagulant Therapy After Coronary Stenting: An Open-Label, Randomized, Controlled Trial
Source: PubMed Central journal article supplement — Circulation. 2021 Aug 29;144(15):1196–211. doi: 10.1161/CIRCULATIONAHA.121.056680 (PMC8500374; doi:10.1161/circulationaha.121.056680), 2021-08-29

# SUPPLEMENTAL MATERIAL

## Contents

|                                                                                                                                                                                    |    |
|------------------------------------------------------------------------------------------------------------------------------------------------------------------------------------|----|
| MASTER DAPT trial: committees and investigators.....                                                                                                                               | 2  |
| Additional information on the methods.....                                                                                                                                         | 10 |
| Table I. APT regimen(s) allowed after each type of event according to presence or absence of clinical indication for OAC.....                                                      | 11 |
| Table II. NARC classification used to evaluate adherence to the randomized antiplatelet regimens.....                                                                              | 12 |
| Table III. Treated lesion characteristics according to presence or absence of clinical indication for OAC.....                                                                     | 13 |
| Table IV. Medications according to presence or absence of clinical indication for OAC.....                                                                                         | 15 |
| Table V. Dual and single antiplatelet therapy according to presence or absence of clinical indication for OAC ...                                                                  | 23 |
| Table VI. Reasonable* and perfect† adherence according to presence or absence of clinical indication for OAC25                                                                     |    |
| Table VII. Clinical outcomes using a landmark analysis at 150 days (6-month visit) according to presence or absence of clinical indication for OAC (per-protocol populations)..... | 26 |
| Table VIII. Clinical outcomes 11 months post-randomization (12-month follow-up) according to presence or absence of clinical indication for OAC (per-protocol population).....     | 28 |
| Table IX. Overview of protocol violations* used to define the per-protocol population according to presence or absence of clinical indication for 12-month OAC.....                | 30 |
| Figure I. Adherence to allocated medication regimen for patients on oral anticoagulation therapy and antiplatelet therapy.....                                                     | 31 |

## MASTER DAPT trial: committees and investigators

### Executive committee

|                                               |                                    |
|-----------------------------------------------|------------------------------------|
| Coprincipal Investigator                      | M. Valgimigli                      |
| Coprincipal Investigator                      | P.C. Smits                         |
| Sponsor Representative                        | G.A. Van Es until June 1, 2018     |
| Sponsor Representative                        | From June, 1 2018, G.B.W.E. Vos    |
| Sponsor Representative                        | From October 16, 2020, E. Spitzer  |
| Principal Investigators                       | P. Vrancks; B. Chevalier; Y. Ozaki |
| Clinical Research Organization Representative | M.C. Morice                        |
| Cardiologists                                 | Y. Onuma; E. Frigoli               |
| Bern University Hospital Representative       | A. Frenk                           |
| Biostatisticians                              | P. Jüni; J. Tijssen                |
| Terumo Representative (nonvoting member)      | D. Paunovic                        |

### Steering committee

#### National Lead Investigators

|                                                                   |                  |
|-------------------------------------------------------------------|------------------|
| Bangladesh, India                                                 | M.S. Ajit        |
| Kingdom of Bahrain, Saudi Arabia                                  | M. Alasnag       |
| Belgium                                                           | J. Bartunek      |
| France                                                            | B. Chevalier     |
| Italy                                                             | A. Colombo       |
| United Kingdom                                                    | D. Hildick-Smith |
| Portugal, Spain                                                   | A. Iñiguez       |
| Austria, Denmark, Estonia, Germany, Sweden                        | F. Mahfoud       |
| Israel                                                            | R. Kornowski     |
| Bulgaria, Czech Republic, Hungary, Poland                         | M. Lesiak        |
| Singapore, South Korea, Vietnam                                   | P.J. Ong         |
| Japan                                                             | Y. Ozaki         |
| Argentina                                                         | A.E. Rodriguez   |
| Switzerland                                                       | M. Roffi         |
| Australia                                                         | C. Schultz       |
| Macedonia, Serbia                                                 | G. Stankovic     |
| The Netherlands                                                   | P. Tonino        |
| <b>Top enrollers</b>                                              |                  |
| Inselspital, Bern, Switzerland                                    | Aris Moschovitis |
| North Estonia Medical Center, Tallinn, Estonia                    | Peep Laanmets    |
| Interventional Cardiology Unit, Policlinico Casilino, Rome, Italy | Michael Donahue  |

### Data monitoring committee

|                 |             |
|-----------------|-------------|
| Chair           | M. Bertrand |
| Biostatistician | S. Pocock   |
| Cardiologist    | P. Urban    |

### Clinical events committee

|               |                                             |
|---------------|---------------------------------------------|
| Chair         | S. Leonardi                                 |
| Cardiologists | C. Hanet; R. Lopes; E.P. McFadden; P. Radke |
| Neurologist   | R. O. Roine                                 |

### Safety reporting group (Cardialysis, Rotterdam, The Netherlands)

Boudijn Ladan (Safety Specialist), Laura van der Waal (Safety Assistant), Yvonne Engelbrecht (Safety Assistant), Fred Paddenburg (Safety Manager), Ben Ren, M.D., Ph.D. (Medical Reviewer).

### CEC management group (Cardialysis, Rotterdam, The Netherlands)

Ingrid de Zwart (Data Manager), Liliane Elshout (Data Manager), Judith Jonk (Data Manager), Tessa Rademaker-Havinga (Statistician).

## Project management

Ria van Vliet (Project Manager, ECRI, Rotterdam, The Netherlands). Marie-Claude Morice (Medical Director, CERC, France), Phani Krishna Kondamudi (Clinical Project Leader, CERC, France), Laure Morsiani (Clinical Operations Manager, CERC, France), Ute Windhövel (Regulatory Affairs Manager, CERC, France). Anita van der Wal (Project Manager, Cardialysis, Rotterdam, the Netherlands), Chantal Bakker (Project Manager, Cardialysis, Rotterdam, The Netherlands). Kazuhiro Minagawa (Project Manager, CVQuest, Tokyo, Japan).

## Countries, investigators, and numbers of patients enrolled

| Country    | Site name                                                      | Principal investigator                                            | Patients randomised (n=4579) | Patients consented but not randomised (n=625) |
|------------|----------------------------------------------------------------|-------------------------------------------------------------------|------------------------------|-----------------------------------------------|
| Argentina  |                                                                |                                                                   | 16                           | 1                                             |
|            | Buenos Aires, Otamendi Hospital                                | Dr Juan Mieres                                                    | 8                            |                                               |
|            | Buenos Aires, Instituto Cardiovascular de Buenos Aires         | Dr Fernando Cura                                                  | 5                            | 1                                             |
|            | Buenos Aires, Clinica IMA                                      | Dr Carlos Fernandez-Pereira                                       | 3                            |                                               |
| Australia  |                                                                |                                                                   | 142                          | 19                                            |
|            | Perth, Royal Perth Hospital-Cardiology Research                | Prof. Carl Schultz                                                | 66                           | 7                                             |
|            | Wollongong, Wollongong Hospital                                | Dr Astin Lee                                                      | 55                           | 6                                             |
|            | Sydney, Prince of Wales Hospital                               | Dr Nigel Jepson                                                   | 8                            | 2                                             |
|            | Fitzroy, St Vincent Hospital                                   | Prof. Robert Whitbourn                                            | 7                            |                                               |
|            | Chermside, The Prince Charles Hospital                         | Dr Owen Christopher Raffel                                        | 6                            | 4                                             |
| Austria    |                                                                |                                                                   | 44                           | 11                                            |
|            | Vienna, Wilhelminenspital                                      | Prof. Kurt Huber                                                  | 29                           | 9                                             |
|            | Vienna, Rudolfstiftung Hospital                                | Prof. Franz Weidinger                                             | 15                           | 2                                             |
| Bangladesh | Dhaka, National Heart Foundation Hospital & Research Institute | Prof. Fazila-Tun-Nesa Malik                                       | 39                           | 1                                             |
| Belgium    |                                                                |                                                                   | 302                          | 51                                            |
|            | Hasselt, Jessa Ziekenhuis                                      | Prof. Pascal Vranckx                                              | 91                           | 14                                            |
|            | Bonheiden, Imelda Ziekenhuis                                   | Dr Willem Dewilde                                                 | 90                           | 14                                            |
|            | Charleroi, CHU de Charleroi – Hopital Civil Marie Curie        | Dr Adel Aminian                                                   | 48                           | 3                                             |
|            | Aalst, OLV Ziekenhuis                                          | Prof. Emanuele Barbato----<br>from 6th Sep 2018 Dr Jozef Bartunek | 47                           | 7                                             |
|            | Liege, CHR La Citadelle                                        | Dr Suzanne Pourbaix                                               | 24                           | 11                                            |
|            | Brussels, CHU St. Pierre UMC St. Pieter                        | Dr Panagiotis Xaplanteris                                         | 2                            | 2                                             |
| Bulgaria   |                                                                |                                                                   | 183                          | 11                                            |
|            | Sofia, UMHAT St. Anna                                          | Dr Vasil Velchev                                                  | 91                           |                                               |

| <b>Country</b>        | <b>Site name</b>                                        | <b>Principal investigator</b> | <b>Patients randomised (n=4579)</b> | <b>Patients consented but not randomised (n=625)</b> |
|-----------------------|---------------------------------------------------------|-------------------------------|-------------------------------------|------------------------------------------------------|
|                       | Plovdiv, MHAT "Sveta Karidad" Plovdiv                   | Dr Dimitar Karageorgiev       | 60                                  | 10                                                   |
|                       | Sofia, National Heart Hospital                          | Dr Hristo Mateev              | 23                                  | 1                                                    |
|                       | Sofia, Tokuda Hospital                                  | Prof. Valeri Gelev            | 9                                   |                                                      |
| <b>Czech Republic</b> |                                                         |                               | 134                                 | 17                                                   |
|                       | Brno, University Hospital Brno                          | Prof. Petr Kala               | 120                                 | 17                                                   |
|                       | Praha, Na Homolce Hospital                              | Dr Martin Mates               | 14                                  |                                                      |
| <b>Denmark</b>        | Roskilde, Roskilde Hospital Kogevej                     | Dr Henning Kelbæk             | 13                                  |                                                      |
| <b>Estonia</b>        | Tallinn, North-Estonia Medical Centre Foundation        | Dr Peep Laanmets              | 259                                 | 12                                                   |
| <b>France</b>         |                                                         |                               | 578                                 | 67                                                   |
|                       | Massy, Hopital Prive Jacques Cartier                    | Dr Thomas Hovasse             | 129                                 | 19                                                   |
|                       | Montauban, Clinique du Pont de Chaume                   | Dr Laurent Delorme            | 124                                 | 7                                                    |
|                       | Marseille, CHU La Timone                                | Prof. Thomas Cuisset          | 41                                  |                                                      |
|                       | Annecy, Centre Hospitalier Annecy Genvois               | Dr Loïc Belle                 | 37                                  |                                                      |
|                       | Caen, Centre hospitalier regional universitaire de Caen | Prof. Farzin Beygui           | 33                                  | 9                                                    |
|                       | Nantes, Hopital Prive le Confluent                      | Dr Ashok Tirouvanziam         | 31                                  |                                                      |
|                       | Montpellier, Clinique du Millenaire                     | Prof. Christophe Piot         | 30                                  | 4                                                    |
|                       | Caen, Hopital Prive Saint Martin                        | Dr Jean François Morelle      | 27                                  | 4                                                    |
|                       | Rouen, Clinique Saint-Hilaire                           | Dr Rene Koning                | 27                                  | 7                                                    |
|                       | Metz, Hopital de Mercy                                  | Dr Mathieu Valla              | 24                                  | 3                                                    |
|                       | Dijon, GCIDB – Hopital Prive Dijon Bourgogne            | Dr Philippe Brunel            | 23                                  | 5                                                    |
|                       | Nimes, CHU Caremeau                                     | Dr Guillaume Cayla            | 18                                  | 4                                                    |
|                       | Creteil, Centre Hospitalier Universitaire Henri-Mondor  | Prof. Emmanuel Teiger         | 12                                  | 2                                                    |
|                       | Paris, Hopital Universitaire Pitie-Salpetriere          | Prof. Gilles Montalescot      | 10                                  | 2                                                    |
|                       | Paris, Hopital Europeen Georges-Pompidou                | Prof. Christian Spaulding     | 9                                   | 1                                                    |
|                       | Saint-Denis, Centre Cardiologique du Nord               | Dr Phillipe Guyon             | 3                                   |                                                      |
| <b>Germany</b>        |                                                         |                               | 24                                  | 6                                                    |
|                       | Homburg, Saarland University                            | Prof. Felix Mahfoud           | 20                                  | 6                                                    |
|                       | Landshut, Landshut-Archdorf Krankenhaus                 | Dr Pyxaras, Stylianos         | 4                                   |                                                      |

| Country | Site name                                                          | Principal investigator                                     | Patients randomised (n=4579) | Patients consented but not randomised (n=625) |
|---------|--------------------------------------------------------------------|------------------------------------------------------------|------------------------------|-----------------------------------------------|
| Hungary |                                                                    |                                                            | 68                           | 5                                             |
|         | Budapest, Semmelweis University Heart and Vascular Center          | Prof. Béla Merkely                                         | 46                           | 5                                             |
|         | Szeged, Invasive Cardiology Unit University of Szeged              | Dr Imre Ungi                                               | 22                           |                                               |
| India   |                                                                    |                                                            | 147                          | 11                                            |
|         | Coimbatore, G Kuppuswamy Naidu Memorial Hospital                   | Dr Rajpal K Abhaichand                                     | 94                           | 10                                            |
|         | Surat, Shri BD Mehta Mahavir Heart Institute                       | Dr Atul Damodar Abhyankar                                  | 33                           |                                               |
|         | Chennai, Apollo Hospitals, Chennai                                 | Dr Sengottuvelu. G                                         | 13                           | 1                                             |
|         | Chennai, Madras Medical Mission                                    | Dr Ajit Mullasari .S                                       | 7                            |                                               |
| Israel  |                                                                    |                                                            | 100                          | 33                                            |
|         | Safed, Ziv Medical Center, Cardiology Department                   | Dr Halabi Majdi                                            | 37                           | 9                                             |
|         | Petach Tikva, Rabin MC                                             | Prof. Ran Kornowski                                        | 34                           | 11                                            |
|         | Haifa, Rambam Medical Center                                       | Prof. Ariel Roguin---from 14th Oct 2018 Dr Yair Feld       | 16                           | 6                                             |
|         | Jerusalem, Hadassah Ein Karem Medical Center                       | Prof. Chaim Lotan                                          | 13                           | 7                                             |
| Italy   |                                                                    |                                                            | 276                          | 37                                            |
|         | Rome, Policlinico Casilino                                         | Dr Michael Donahue                                         | 99                           | 6                                             |
|         | Vimercate, Ospedale di Vimercate                                   | Dr Stefano Garducci                                        | 48                           | 3                                             |
|         | Rozzano, Humanitas Research Hospital                               | Dr Bernhard Reimers                                        | 30                           | 2                                             |
|         | Rome, Policlinico Umberto I                                        | Dr Gennaro Sardella                                        | 20                           | 2                                             |
|         | Milan, San Raffaele Hospital                                       | Dr Antonio Colombo---from 20th June 2019 Dr Alaide Chieffo | 12                           | 1                                             |
|         | Catania, Ferrarotto Hospital                                       | Prof. Corrado Tamburino                                    | 9                            | 2                                             |
|         | Messina, AOU Policlinico Martino                                   | Dr Giuseppe Andò                                           | 8                            | 4                                             |
|         | Milan, Policlinico San Donato                                      | Dr Luca Testa                                              | 8                            | 4                                             |
|         | Milan, Sacco Hospital                                              | Dr Maurizio Di Biasi                                       | 8                            | 6                                             |
|         | Rome, Ospedale Sandro Pertini                                      | Dr Alessandro Sciahbasi                                    | 8                            | 3                                             |
|         | Caserta, Azienda Ospedaliera di Caserta Sant Anna e San Sebastiano | Prof.Dr Paolo Calabro                                      | 6                            | 1                                             |
|         | Andria, Ospedale Lorenzo Bonomo                                    | Dr Gianluigi Minervini                                     | 5                            |                                               |
|         | Cagliari, Azienda Ospedaliera Brotzu                               | Dr Bruno Loi                                               | 5                            |                                               |

| Country            | Site name                                               | Principal investigator | Patients randomised (n=4579) | Patients consented but not randomised (n=625) |
|--------------------|---------------------------------------------------------|------------------------|------------------------------|-----------------------------------------------|
|                    | Milan, Centro Cardiologico Monzino IRCCS                | Dr Franco Fabbiocchi   | 5                            |                                               |
|                    | Milan, ASST Grande Ospedale Metropolitano Niguarda      | Dr Jacopo Oreglia      | 4                            | 3                                             |
|                    | Treviglio, ASST Bergamo Ovest                           | Dr Paolo Sganzerla     | 1                            |                                               |
| Japan              |                                                         |                        | 188                          | 17                                            |
|                    | Toyoake, Fujita Health University Hospital              | Prof. Yukio Ozaki      | 60                           | 2                                             |
|                    | Kokura, Fukuoka Kokura Memorial Hospital                | Dr Kenji Ando          | 43                           | 2                                             |
|                    | Osaka, Osaka Police Hospital                            | Dr Yoshiharu Higuchi   | 22                           | 4                                             |
|                    | Tokyo, Sakakibara Heart Institute                       | Dr Mamoru Nanasato     | 13                           | 1                                             |
|                    | Kanagawa, St. Marianna University School of Medicine    | Dr Yuki Ishibashi      | 11                           | 1                                             |
|                    | Gifu, Gifu Heart Center                                 | Dr Hitoshi Matsuo      | 10                           |                                               |
|                    | Nagoya, Japanese Red Cross Nagoya Daini Hospital        | Dr Ruka Yoshida        | 8                            | 2                                             |
|                    | Ichinomiya, Ichinomiya municipal hospital               | Dr Kiyokazu Shimizu    | 6                            | 2                                             |
|                    | Nagoya, Japanese Red Cross Nagoya                       | Dr Haruo Kamiya        | 4                            | 2                                             |
|                    | 634 – Japan, Tokyo, St. Lukes International Hospital    | Dr Nobuyuki Komiyama   | 4                            | 1                                             |
|                    | Nagakuteshi, Aichi Medical University Hospital          | Dr Tetsuya Amano       | 3                            |                                               |
|                    | Nagoya, Nagoya University Hospital                      | Dr Toyoaki Murohara    | 2                            |                                               |
|                    | Sapporo, Sapporo Higashi Tokushukai Hospital            | Dr Seiji Yamazaki      | 2                            |                                               |
| Kingdom of Bahrain | Riffa, Bahrain Defence Force Hospital                   | Dr Husam Noor          | 7                            | 1                                             |
| Macedonia          | Skopje, University Clinic of Cardiology                 | Dr Sasko Kedev         | 120                          | 3                                             |
| Poland             |                                                         |                        | 177                          | 7                                             |
|                    | Krakow, Institute Of Cardiology Jagiellonian University | Dr Jakub Podolec       | 69                           | 4                                             |
|                    | Poznan, Szpital Kliniczny Przemienienia Panskiego       | Prof. Maciej Lesiak    | 50                           | 1                                             |
|                    | Wroclaw, 4 Wojskowy Szpital Kliniczny                   | Dr Krzysztof Reczuch   | 33                           | 1                                             |
|                    | Lubin, Miedziowe Centrum Zdrowia SA                     | Dr Adian Wlodarczak    | 18                           | 1                                             |

| Country      | Site name                                              | Principal investigator                                           | Patients randomised (n=4579) | Patients consented but not randomised (n=625) |
|--------------|--------------------------------------------------------|------------------------------------------------------------------|------------------------------|-----------------------------------------------|
|              | Krakow, University Hospital Krakow Poland              | Prof. Dariusz Dudek                                              | 7                            |                                               |
| Portugal     | Lisbon, Hospital de Santa Maria                        | Dr Pedro Canas da Silva                                          | 1                            |                                               |
| Saudi Arabia | King Fahd Armed Forces Hospital                        | Dr Mirvat Alasnag                                                | 16                           | 1                                             |
| Serbia       |                                                        |                                                                  | 138                          | 11                                            |
|              | Belgrade, Institute for Cardiovascular Disease Dedinje | Dr Ljupco Mangovski – from 17 April 2019<br>Dr Dragan Topic      | 67                           | 4                                             |
|              | Belgrade, Clinical Center of Serbia                    | Prof. Goran Stankovic                                            | 61                           | 7                                             |
|              | Sremska Kamenica, Institute of Cardiovascular Diseases | Dr Dragan Debeljacki                                             | 10                           |                                               |
| Singapore    |                                                        |                                                                  | 46                           | 10                                            |
|              | Singapore, Tan Tock Seng Hospital                      | Prof. Paul Ong Jau Lueng                                         | 38                           | 10                                            |
|              | Singapore, KhooTeck Puat Hospital                      | Dr Syed Saqib Imran                                              | 8                            |                                               |
| South Korea  | Seoul, Asan Medical Center                             | Dr Park Seung-Jung                                               | 15                           |                                               |
| Spain        |                                                        |                                                                  | 196                          | 10                                            |
|              | Huelva, Juan Ramon Jimenez Hospital                    | Dr José Francisco Diaz Fernandez                                 | 47                           | 1                                             |
|              | Vigo, Alvaro Cunqueiro                                 | Prof. Andrés Iniguez                                             | 40                           | 2                                             |
|              | Barcelona, Hospital Vall Hebron                        | Dr Bruno Garcia del Blanco                                       | 27                           |                                               |
|              | Alicante, Hospital General Universitario de Alicante   | Dr Vicente Mainar                                                | 19                           | 2                                             |
|              | Madrid, Hospital 12 de Octubre                         | Dr Ivan Gomez Blazquez                                           | 17                           |                                               |
|              | El Palmar, Universitario Virgen de la Arrixaca         | Dr Eduardo Pinar                                                 | 15                           | 1                                             |
|              | Madrid, Hospital Clinico San Carlos                    | Prof. Javier Escaned Barbosa                                     | 11                           | 2                                             |
|              | Barcelona, Bellvitge University Hospital               | Dr Joan Antoni Gomez Hospital                                    | 10                           | 2                                             |
|              | Santander, Hospital Universitario Valdecilla           | Dr Fermin Sainz                                                  | 9                            |                                               |
|              | Majadahonda, Hospital Universitario Puerta de Hierro   | Dr Javier Goicolea                                               | 1                            |                                               |
| Sweden       |                                                        |                                                                  | 8                            |                                               |
|              | Orebro, Orebro University Hospital                     | Dr Ole Fröbert                                                   | 6                            |                                               |
|              | Gavle, Gavle Hospital                                  | Dr Robert Kastberg                                               | 2                            |                                               |
| Switzerland  |                                                        |                                                                  | 499                          | 111                                           |
|              | Bern, Inselspital                                      | Dr Aris Moschovitis---from 20th Oct 2020 Prof. Stephan Windecker | 308                          | 61                                            |
|              | Liestal, Kantonsspital Baselland                       | Dr Gregor Leibundgut                                             | 68                           | 14                                            |

| Country        | Site name                                                 | Principal investigator                         | Patients randomised (n=4579) | Patients consented but not randomised (n=625) |
|----------------|-----------------------------------------------------------|------------------------------------------------|------------------------------|-----------------------------------------------|
|                | Lugano, Cardiocentro Ticino                               | Dr Giovanni Pedrazzini                         | 31                           | 9                                             |
|                | Geneva, University Hospital                               | Prof. Marco Roffi                              | 29                           | 13                                            |
|                | Bern, Lindenhofspital                                     | Dr Ali Garachemani                             | 28                           | 3                                             |
|                | Zurich, University Hospital Zurich                        | Dr Patrick Siegrist                            | 18                           | 7                                             |
|                | Fribourg, HFR Hopital cantonal                            | Prof. Stéphane Cook                            | 17                           | 4                                             |
| Netherlands    |                                                           |                                                | 539                          | 122                                           |
|                | Rotterdam, Maasstad Ziekenhuis                            | Dr Peter Smits                                 | 233                          | 79                                            |
|                | Terneuzen, Zorgsaam                                       | Dr Al Mafragi                                  | 87                           | 5                                             |
|                | Emmen, Treant Zorggroep                                   | PI Dr Jessurun---from 1st July 2020 Dr Ruifrok | 67                           | 9                                             |
|                | Eindhoven, Catharina Ziekenhuis                           | Dr Pim Tonino                                  | 54                           | 10                                            |
|                | Arnhem, Rijnstate Ziekenhuis                              | Dr Peter Danse                                 | 29                           | 8                                             |
|                | Hertogenbosch, Jeroen Bosch Ziekenhuis                    | Dr J. Polad                                    | 21                           | 3                                             |
|                | Dordrecht, Albert Schweitzer Ziekenhuis                   | Dr Floris Kauer                                | 20                           | 6                                             |
|                | Enschede, Medisch Spectrum Twente                         | Dr Clemens von Birgelen                        | 19                           |                                               |
|                | Nieuwegein, Antonius Ziekenhuis Nieuwegein                | Dr Jurrien ten Berg                            | 5                            | 1                                             |
|                | Breda, Amphia Ziekenhuis                                  | Dr Sander Ijsselmuiden                         | 3                            |                                               |
|                | Den Haag, Hagahospital                                    | Dr Samer Somi                                  | 1                            | 1                                             |
| United Kingdom |                                                           |                                                | 279                          | 48                                            |
|                | Bristol, Bristol Heart Institute                          | Dr Tom Johnson                                 | 55                           | 13                                            |
|                | Worcester, Worcestershire Royal Hospital                  | Dr Helen Routledge                             | 43                           | 8                                             |
|                | Brighton, Brighton & Sussex University Hospitals Trust    | Dr David Hildick-Smith                         | 40                           | 3                                             |
|                | Bournemouth, Royal Bournemouth Hospital                   | Dr Jehangir Din                                | 34                           | 7                                             |
|                | Wolverhampton, Heart and Lung Centre – New Cross Hospital | Dr Shahzad Munir                               | 22                           | 6                                             |
|                | Blackburn, Royal Blackburn Hospital                       | Dr John McDonald                               | 20                           | 1                                             |
|                | Stevenage, Lee Haynes Research Institute, Lister Hospital | Dr Neville Kukreja                             | 20                           | 1                                             |
|                | Stoke on Trent, Royal Stoke University Hospital           | Prof. Mamas Mamas                              | 20                           | 5                                             |
|                | Newcastle upon Tyne, Freeman Hospital                     | Dr Rajiv Das                                   | 13                           | 1                                             |



| <b>Country</b> | <b>Site name</b>                                           | <b>Principal investigator</b> | <b>Patients randomised (n=4579)</b> | <b>Patients consented but not randomised (n=625)</b> |
|----------------|------------------------------------------------------------|-------------------------------|-------------------------------------|------------------------------------------------------|
|                | Manchester, Wythenshawe Hospital                           | Dr Hussain Contractor         | 8                                   | 3                                                    |
|                | Derry, Altnagelvin Hospital                                | Dr Aaron Peace                | 2                                   |                                                      |
|                | London, St. George's Hospitals                             | Dr Rupert Williams            | 2                                   |                                                      |
| Vietnam        | Vietnam National Heart Institute – Bach Mai Hospital Hanoi | Prof. Nguyen Ngoc Quang       | 25                                  | 2                                                    |

## **Additional information on the methods**

### **Inclusion criteria**

#### *Inclusion criteria after index PCI*

- Age  $\geq 18$  years
- At least one high bleeding risk criterion (listed above)
- All coronary lesions successfully treated with Ultimaster stent
- Free of any flow-limiting angiographic complications that required prolonged dual antiplatelet therapy (DAPT) duration based on operator's decision
- All stages of PCI were complete and no further PCI was planned.

#### *Inclusion criteria at 1-month randomization visit (30–44 days after qualifying index PCI)*

- At least one high bleeding risk criterion (listed above) or on the basis of post-PCI actionable nonaccess-site related bleeding episode
- Uneventful 30-day clinical course (i.e. freedom from any new episode of acute coronary syndrome, symptomatic restenosis, stent thrombosis, stroke, any revascularization requiring prolonged DAPT)
- If not on OAC:
  - Patient was on DAPT regimen of aspirin and a P2Y<sub>12</sub> inhibitor;
  - Patient with one type of P2Y<sub>12</sub> inhibitor for at least 7 days.
- If on OAC:
  - Patient was on the same type of OAC for at least 7 days;
  - Patient was on clopidogrel for at least 7 days.

### **Exclusion criteria**

Patients were not eligible if any of the following applied:

- Treated with stent other than Ultimaster stent within 6 months prior to index PCI
- Treated for in-stent restenosis or stent thrombosis at index PCI or within 6 months before
- Treated with a bioresorbable scaffold at any time prior to index procedure
- Incapable of providing written informed consent
- Under judicial protection, tutorship or curatorship
- Unable to understand and follow study-related instructions or unable to comply with study protocol
- Active bleeding requiring medical attention (Bleeding Academic Research Consortium [BARC]  $\geq 2$ ) on randomization visit
- Life expectancy less than 1 year
- Known hypersensitivity or allergy to aspirin, clopidogrel, ticagrelor, prasugrel, cobalt chromium or sirolimus
- Any planned and anticipated PCI
- Participation in another trial
- Pregnant or breastfeeding women

**Table I. APT regimen(s) allowed after each type of event according to presence or absence of clinical indication for OAC**

| Event type (according to the investigator)        | Indication for OAC                    |                                       | No indication for OAC                 |                                       |
|---------------------------------------------------|---------------------------------------|---------------------------------------|---------------------------------------|---------------------------------------|
|                                                   | Abbreviated DAPT                      | Non-abbreviated DAPT                  | Abbreviated DAPT                      | Non-abbreviated DAPT                  |
| Repeat percutaneous coronary intervention         | +30 days of DAPT                      | ≥90 days of DAPT                      | +30 days of DAPT                      | ≥180 days of DAPT                     |
| Stent thrombosis                                  | Routine care*                         | Routine care*                         | Routine care*                         | Routine care*                         |
| Myocardial infarction                             | Routine care*                         | Routine care*                         | Routine care*                         | Routine care*                         |
| First occurrence of a BARC type 2 bleeding event† | Routine care* until bleeding resolved |
| From the second BARC 2 bleeding event onwards     | Routine care*                         | Routine care*                         | Routine care*                         | Routine care*                         |
| BARC 3 to 5 bleeding event                        | Routine care*                         | Routine care*                         | Routine care*                         | Routine care*                         |
| Stroke                                            | Routine care*                         | Routine care*                         | Routine care*                         | Routine care*                         |
| Temporary discontinuation‡                        | +7 days of routine care               |

\* Treatment according to investigator discretion/local practice.

† Bleeding resolved: date the site reported that the bleeding event had resolved. If the patient had another BARC 2 bleeding event (second BARC), they were allowed to continue routine care after the second BARC 2 bleeding event.

‡ Only temporary discontinuations due to surgery or non-revascularization intervention requiring (temporary) stop or dosage change were allowed. If the patient did not restart the regimen after 7 days, the 0–7 days were coded as adherent, but day 8 and later were coded as non-adherent. Note that patients who permanently changed OAC treatment between day  $t=0$  and 335 days should accordingly have changed to the APT regimen recommended in the protocol on the day of the switch  $t$  and thereafter.

APT, antiplatelet; BARC, Bleeding Academic Research Consortium; DAPT, dual antiplatelet treatment; OAC, oral anticoagulant.

**Table II. NARC classification used to evaluate adherence to the randomized antiplatelet regimens**

| <b>NARC class</b> | <b>Adherence to randomized treatment</b>                                                                       |
|-------------------|----------------------------------------------------------------------------------------------------------------|
| 0                 | Permanently adherent or allowed change according to <a href="#">Table II</a>                                   |
| 1                 | ≤2 days of interruptions (not counting allowed change according to <a href="#">Table II</a> )                  |
| 2                 | Temporary discontinuation for >2 days (not counting allowed change according to <a href="#">Table II</a> )     |
| 3                 | Permanent discontinuation until 11 months (not counting allowed change according to <a href="#">Table II</a> ) |

Patients who permanently changed oral anticoagulant treatment between day  $t=0$  and 335 days should accordingly have changed to the antiplatelet regimen recommended in the protocol on the day of the switch  $t$ . For instance, patients adding oral anticoagulant post-randomization in the abbreviated dual antiplatelet therapy arm should have continued single antiplatelet therapy until the 6-month visit; if oral anticoagulant was added after the 6-month visit, they should immediately have stopped single antiplatelet therapy.

NARC, non-adherence Academic Research Consortium.

**Table III. Treated lesion characteristics according to presence or absence of clinical indication for OAC**

|                                               | Indication for OAC |                      | No indication for OAC |                      |
|-----------------------------------------------|--------------------|----------------------|-----------------------|----------------------|
|                                               | Abbreviated DAPT   | Non-abbreviated DAPT | Abbreviated DAPT      | Non-abbreviated DAPT |
| Number of patients                            | 848                | 818                  | 1447                  | 1466                 |
| <b>Number of treated lesions</b>              | <b>1186</b>        | <b>1178</b>          | <b>2108</b>           | <b>2162</b>          |
| Lesion location                               |                    |                      |                       |                      |
| Left main                                     | 50 (4.2%)          | 44 (3.7%)            | 78 (3.7%)             | 91 (4.2%)            |
| LAD artery                                    | 509 (42.9%)        | 491 (41.7%)          | 885 (42.0%)           | 941 (43.5%)          |
| Left circumflex artery                        | 268 (22.6%)        | 269 (22.8%)          | 459 (21.8%)           | 499 (23.1%)          |
| Right coronary artery                         | 345 (29.1%)        | 352 (29.9%)          | 660 (31.3%)           | 610 (28.2%)          |
| Bypass graft                                  |                    |                      |                       |                      |
| SVG                                           | 9 (0.8%)           | 18 (1.5%)            | 25 (1.2%)             | 20 (0.9%)            |
| LIMA/RIMA/radial graft                        | 6 (0.5%)           | 5 (0.4%)             | 3 (0.1%)              | 1 (0.0%)             |
| Bifurcation or trifurcation disease           | 189 (15.9%)        | 179 (15.2%)          | 346 (16.4%)           | 342 (15.8%)          |
| Rotablator used                               | 27 (2.3%)          | 26 (2.2%)            | 51 (2.4%)             | 47 (2.2%)            |
| Final residual lesion stenosis confirmed <20% | 1170 (98.7%)       | 1159 (98.4%)         | 2080 (98.7%)          | 2141 (99.0%)         |
| TIMI flow before PCI                          |                    |                      |                       |                      |
| 0 or 1                                        | 132/1175 (11.2%)   | 149/1166 (12.8%)     | 292/2086 (14.0%)      | 319/2147 (14.9%)     |
| 2                                             | 124/1175 (10.6%)   | 120/1166 (10.3%)     | 237/2086 (11.4%)      | 222/2147 (10.3%)     |
| 3                                             | 919/1175 (78.2%)   | 897/1166 (76.9%)     | 1557/2086 (74.6%)     | 1606/2147 (74.8%)    |
| TIMI flow after PCI                           |                    |                      |                       |                      |
| 0 or 1                                        | 3 (0.3%)           | 0/1177 (0.0%)        | 8/2107 (0.4%)         | 3/2161 (0.1%)        |
| 2                                             | 5 (0.4%)           | 9/1177 (0.8%)        | 13/2107 (0.6%)        | 21/2161 (1.0%)       |
| 3                                             | 1178 (99.3%)       | 1168/1177 (99.2%)    | 2086/2107 (99.0%)     | 2137/2161 (98.9%)    |
| Lesion treatment                              |                    |                      |                       |                      |
| Balloonng or thrombus aspiration only         | 21 (1.8%)          | 15 (1.3%)            | 35 (1.7%)             | 43 (2.0%)            |
| Stenting                                      | 1165 (98.2%)       | 1163 (98.7%)         | 2073 (98.3%)          | 2119 (98.0%)         |

|                                  | Indication for OAC |                      | No indication for OAC |                      |
|----------------------------------|--------------------|----------------------|-----------------------|----------------------|
|                                  | Abbreviated DAPT   | Non-abbreviated DAPT | Abbreviated DAPT      | Non-abbreviated DAPT |
| <b>Number of stented lesions</b> | <b>(n=1165)</b>    | <b>(n=1163)</b>      | <b>(n=2073)</b>       | <b>(n=2119)</b>      |
| Stent(s) used*                   |                    |                      |                       |                      |
| Ultimaster stent                 | 1161 (99.7%)       | 1161 (99.8%)         | 2070 (99.9%)          | 2114 (99.8%)         |
| Other drug-eluting stent         | 5 (0.4%)           | 3 (0.3%)             | 4 (0.2%)              | 6 (0.3%)             |
| Bare-metal stent                 | 0 (0.0%)           | 1 (0.1%)             | 0 (0.0%)              | 0 (0.0%)             |
| Number of stents                 | 1.3 (0.6) (n=1158) | 1.2 (0.6) (n=1157)   | 1.2 (0.5) (n=2055)    | 1.2 (0.5) (n=2110)   |
| Overlapping stenting             | 184/1158 (15.9%)   | 160/1157 (13.8%)     | 341/2055 (16.6%)      | 322/2110 (15.3%)     |
| Total stent length, mm           | 27.3 (17.3)        | 27.3 (16.5)          | 28.2 (16.3)           | 27.9 (15.8)          |
| Stent diameter, mm               | 3.0 (0.5)          | 3.0 (0.5)            | 3.0 (0.5)             | 3.0 (0.5)            |
| Direct stenting                  | 367 (31.5%)        | 391 (33.6%)          | 609 (29.4%)           | 652 (30.8%)          |
| Post-dilatation                  | 714 (61.3%)        | 679 (58.4%)          | 1317 (63.5%)          | 1319 (62.2%)         |

Data are mean (SD), n (%), or n/N (%) in case of missing data.

APT, antiplatelet treatment; DAPT, dual antiplatelet treatment; LAD, left anterior descending; LIMA, left internal mammary artery; OAC, oral anticoagulant; PCI, percutaneous coronary intervention; RIMA, right internal mammary artery; SVG, saphenous vein graft; TIMI, Thrombolysis in Myocardial Infarction.

\*In 5 lesions in 5 different patients, a mix of Ultimaster and other drug-eluting stents were used; in 14 lesions in 12 different patients, only bare-metal stents or only other drug-eluting stents were used.

**Table IV. Medications according to presence or absence of clinical indication for OAC**

|                                                | Indication for OAC       |                              |         | No indication for OAC     |                               |         |
|------------------------------------------------|--------------------------|------------------------------|---------|---------------------------|-------------------------------|---------|
|                                                | Abbreviated DAPT (n=848) | Non-abbreviated DAPT (n=818) | P value | Abbreviated DAPT (n=1447) | Non-abbreviated DAPT (n=1466) | P value |
| <b>At 1-month visit (before randomization)</b> |                          |                              |         |                           |                               |         |
| DAPT                                           | 835 (98.5%)              | 806 (98.5%)                  | 1.00    | 1446 (99.9%)              | 1466 (100.0%)                 | 0.50    |
| SAPT                                           | 13 (1.5%)                | 12 (1.5%)                    | 1.00    | 1 (0.1%)                  | 0 (0.0%)                      | 0.50    |
| No APT                                         | 0 (0.0%)                 | 0 (0.0%)                     | –       | 0 (0.0%)                  | 0 (0.0%)                      | –       |
| Aspirin                                        | 837 (98.7%)              | 807 (98.7%)                  | 1.00    | 1447 (100.0%)             | 1466 (100.0%)                 | –       |
| P2Y12 inhibitor                                | 846 (99.8%)              | 817 (99.9%)                  | 1.00    | 1446 (99.9%)              | 1466 (100.0%)                 | 0.50    |
| Clopidogrel                                    | 838 (98.8%)              | 815 (99.6%)                  | 0.092   | 990 (68.4%)               | 989 (67.5%)                   | 0.61    |
| Prasugrel                                      | 0 (0.0%)                 | 0 (0.0%)                     | –       | 59 (4.1%)                 | 56 (3.8%)                     | 0.78    |
| Ticagrelor                                     | 8 (0.9%)                 | 2 (0.2%)                     | 0.11    | 397 (27.4%)               | 421 (28.7%)                   | 0.46    |
| (N)OAC                                         | 840 (99.1%)              | 812 (99.3%)                  | 0.79    | 3 (0.2%)                  | 1 (0.1%)                      | 0.37    |
| VKA                                            | 290 (34.2%)              | 272 (33.3%)                  | 0.72    | 0 (0.0%)                  | 1 (0.1%)                      | 1.00    |
| Warfarin                                       | 92 (10.8%)               | 77 (9.4%)                    | 0.37    | 0 (0.0%)                  | 0 (0.0%)                      | –       |
| Acenocoumarol                                  | 138 (16.3%)              | 134 (16.4%)                  | 1.00    | 0 (0.0%)                  | 0 (0.0%)                      | –       |
| Phenprocoumon                                  | 28 (3.3%)                | 37 (4.5%)                    | 0.21    | 0 (0.0%)                  | 1 (0.1%)                      | 1.00    |
| Fluindione                                     | 32 (3.8%)                | 24 (2.9%)                    | 0.42    | 0 (0.0%)                  | 0 (0.0%)                      | –       |
| NOAC                                           | 550 (64.9%)              | 540 (66.0%)                  | 0.64    | 3 (0.2%)                  | 0 (0.0%)                      | 0.12    |
| Dabigatran                                     | 112 (13.2%)              | 99 (12.1%)                   | 0.51    | 0 (0.0%)                  | 0 (0.0%)                      | –       |
| Apixaban                                       | 222 (26.2%)              | 203 (24.8%)                  | 0.54    | 2 (0.1%)                  | 0 (0.0%)                      | 0.25    |
| Rivaroxaban                                    | 178 (21.0%)              | 206 (25.2%)                  | 0.048   | 1 (0.1%)                  | 0 (0.0%)                      | 0.50    |
| Edoxaban                                       | 38 (4.5%)                | 32 (3.9%)                    | 0.63    | 0 (0.0%)                  | 0 (0.0%)                      | –       |
| Calcium channel blocker                        | 254 (30.0%)              | 208 (25.4%)                  | 0.043   | 434 (30.0%)               | 453 (30.9%)                   | 0.60    |
| Proton pump inhibitor                          | 598 (70.5%)              | 604 (73.8%)                  | 0.14    | 1009 (69.7%)              | 1037 (70.7%)                  | 0.57    |
| Beta-blocker                                   | 680 (80.2%)              | 644 (78.7%)                  | 0.47    | 1001 (69.2%)              | 1014 (69.2%)                  | 1.00    |

|                                               | Indication for OAC       |                              |         | No indication for OAC     |                               |         |
|-----------------------------------------------|--------------------------|------------------------------|---------|---------------------------|-------------------------------|---------|
|                                               | Abbreviated DAPT (n=848) | Non-abbreviated DAPT (n=818) | P value | Abbreviated DAPT (n=1447) | Non-abbreviated DAPT (n=1466) | P value |
| ACE inhibitor                                 | 427 (50.4%)              | 409 (50.0%)                  | 0.92    | 659 (45.5%)               | 671 (45.8%)                   | 0.91    |
| Angiotensin II receptor blocker               | 236 (27.8%)              | 228 (27.9%)                  | 1.00    | 400 (27.6%)               | 408 (27.8%)                   | 0.93    |
| H <sub>2</sub> blockers                       | 19 (2.2%)                | 22 (2.7%)                    | 0.64    | 23 (1.6%)                 | 27 (1.8%)                     | 0.67    |
| Insulin                                       | 89 (10.5%)               | 68 (8.3%)                    | 0.13    | 152 (10.5%)               | 131 (8.9%)                    | 0.17    |
| Oral hypoglycemic drug                        | 217 (25.6%)              | 219 (26.8%)                  | 0.62    | 350 (24.2%)               | 369 (25.2%)                   | 0.55    |
| Statin                                        | 712 (84.0%)              | 677 (82.8%)                  | 0.55    | 1262 (87.2%)              | 1309 (89.3%)                  | 0.08    |
| Other lipid-lowering drug                     | 76 (9.0%)                | 67 (8.2%)                    | 0.60    | 112 (7.7%)                | 122 (8.3%)                    | 0.59    |
| PCSK9 inhibitor                               | 2 (0.2%)                 | 1 (0.1%)                     | 1.00    | 3 (0.2%)                  | 3 (0.2%)                      | 1.00    |
| Sacubitril+valsartan                          | 17 (2.0%)                | 15 (1.8%)                    | 0.86    | 9 (0.6%)                  | 21 (1.4%)                     | 0.042   |
| Amiodarone                                    | 116 (13.7%)              | 95 (11.6%)                   | 0.21    | 22 (1.5%)                 | 21 (1.4%)                     | 0.88    |
| Ivabradine                                    | 6 (0.7%)                 | 8 (1.0%)                     | 0.60    | 11 (0.8%)                 | 23 (1.6%)                     | 0.06    |
| Nitrate                                       | 120 (14.2%)              | 107 (13.1%)                  | 0.57    | 238 (16.4%)               | 230 (15.7%)                   | 0.58    |
| Diuretic                                      | 414 (48.8%)              | 407 (49.8%)                  | 0.73    | 473 (32.7%)               | 479 (32.7%)                   | 1.00    |
| Spirolactone/eplerenone                       | 122 (14.4%)              | 128 (15.6%)                  | 0.49    | 139 (9.6%)                | 136 (9.3%)                    | 0.80    |
| Steroid                                       | 63 (7.4%)                | 69 (8.4%)                    | 0.47    | 128 (8.8%)                | 145 (9.9%)                    | 0.34    |
| Non-steroidal anti-inflammatory drug          | 16 (1.9%)                | 18 (2.2%)                    | 0.73    | 36 (2.5%)                 | 37 (2.5%)                     | 1.00    |
| <b>At 1-month visit (after randomization)</b> |                          |                              |         |                           |                               |         |
| DAPT                                          | 19 (2.2%)                | 806 (98.5%)                  | <0.001  | 33 (2.3%)                 | 1466 (100.0%)                 | <0.001  |
| SAPT                                          | 826 (97.4%)              | 9 (1.1%)                     | <0.001  | 1408 (97.3%)              | 0 (0.0%)                      | <0.001  |
| No APT                                        | 3 (0.4%)                 | 3 (0.4%)                     | 1.00    | 6 (0.4%)                  | 0 (0.0%)                      | 0.015   |
| Aspirin                                       | 184 (21.7%)              | 807 (98.7%)                  | <0.001  | 528 (36.5%)               | 1466 (100.0%)                 | <0.001  |
| P2Y12 inhibitor                               | 680 (80.2%)              | 814 (99.5%)                  | <0.001  | 946 (65.4%)               | 1466 (100.0%)                 | <0.001  |
| Clopidogrel                                   | 675 (79.6%)              | 812 (99.3%)                  | <0.001  | 600 (41.5%)               | 994 (67.8%)                   | <0.001  |
| Prasugrel                                     | 0 (0.0%)                 | 0 (0.0%)                     | –       | 28 (1.9%)                 | 55 (3.8%)                     | 0.004   |



|                         | Indication for OAC       |                              |         | No indication for OAC     |                               |         |
|-------------------------|--------------------------|------------------------------|---------|---------------------------|-------------------------------|---------|
|                         | Abbreviated DAPT (n=848) | Non-abbreviated DAPT (n=818) | P value | Abbreviated DAPT (n=1447) | Non-abbreviated DAPT (n=1466) | P value |
| Ticagrelor              | 5 (0.6%)                 | 2 (0.2%)                     | 0.45    | 318 (22.0%)               | 417 (28.4%)                   | <0.001  |
| (N)OAC                  | 831 (98.0%)              | 808 (98.8%)                  | 0.25    | 5 (0.3%)                  | 2 (0.1%)                      | 0.29    |
| VKA                     | 288 (34.0%)              | 270 (33.0%)                  | 0.72    | 1 (0.1%)                  | 2 (0.1%)                      | 1.00    |
| Warfarin                | 91 (10.7%)               | 76 (9.3%)                    | 0.37    | 0 (0.0%)                  | 0 (0.0%)                      | –       |
| Acenocoumarol           | 137 (16.2%)              | 133 (16.3%)                  | 1.00    | 1 (0.1%)                  | 1 (0.1%)                      | 1.00    |
| Phenprocoumon           | 28 (3.3%)                | 37 (4.5%)                    | 0.21    | 0 (0.0%)                  | 1 (0.1%)                      | 1.00    |
| Fluindione              | 32 (3.8%)                | 24 (2.9%)                    | 0.42    | 0 (0.0%)                  | 0 (0.0%)                      | –       |
| NOAC                    | 543 (64.0%)              | 538 (65.8%)                  | 0.47    | 4 (0.3%)                  | 0 (0.0%)                      | 0.06    |
| Dabigatran              | 111 (13.1%)              | 97 (11.9%)                   | 0.46    | 1 (0.1%)                  | 0 (0.0%)                      | 0.50    |
| Apixaban                | 218 (25.7%)              | 203 (24.8%)                  | 0.69    | 2 (0.1%)                  | 0 (0.0%)                      | 0.25    |
| Rivaroxaban             | 176 (20.8%)              | 206 (25.2%)                  | 0.036   | 1 (0.1%)                  | 0 (0.0%)                      | 0.50    |
| Edoxaban                | 38 (4.5%)                | 32 (3.9%)                    | 0.63    | 0 (0.0%)                  | 0 (0.0%)                      | –       |
| <b>At 3-month visit</b> |                          |                              |         |                           |                               |         |
| DAPT                    | 16/835 (1.9%)            | 522/807 (64.7%)              | <0.001  | 55/1427 (3.9%)            | 1415/1447 (97.8%)             | <0.001  |
| SAPT                    | 811/835 (97.1%)          | 279/807 (34.6%)              | <0.001  | 1369/1427 (95.9%)         | 31/1447 (2.1%)                | <0.001  |
| No APT                  | 8/835 (1.0%)             | 6/807 (0.7%)                 | 0.79    | 3/1427 (0.2%)             | 1/1447 (0.1%)                 | 0.37    |
| Aspirin                 | 180/835 (21.6%)          | 592/807 (73.4%)              | <0.001  | 536/1427 (37.6%)          | 1433/1447 (99.0%)             | <0.001  |
| P2Y12 inhibitor         | 663/835 (79.4%)          | 731/807 (90.6%)              | <0.001  | 943/1427 (66.1%)          | 1428/1447 (98.7%)             | <0.001  |
| Clopidogrel             | 657/835 (78.7%)          | 730/807 (90.5%)              | <0.001  | 617/1427 (43.2%)          | 977/1447 (67.5%)              | <0.001  |
| Prasugrel               | 0/835 (0.0%)             | 0/807 (0.0%)                 | –       | 26/1427 (1.8%)            | 56/1447 (3.9%)                | 0.001   |
| Ticagrelor              | 6/835 (0.7%)             | 1/807 (0.1%)                 | 0.13    | 301/1427 (21.1%)          | 395/1447 (27.3%)              | <0.001  |
| (N)OAC                  | 821/835 (98.3%)          | 795/807 (98.5%)              | 0.84    | 25/1427 (1.8%)            | 12/1447 (0.8%)                | 0.031   |
| VKA                     | 278/835 (33.3%)          | 261/807 (32.3%)              | 0.71    | 8/1427 (0.6%)             | 3/1447 (0.2%)                 | 0.14    |
| Warfarin                | 88/835 (10.5%)           | 72/807 (8.9%)                | 0.28    | 3/1427 (0.2%)             | 2/1447 (0.1%)                 | 0.69    |

|                                 | Indication for OAC       |                              |         | No indication for OAC     |                               |         |
|---------------------------------|--------------------------|------------------------------|---------|---------------------------|-------------------------------|---------|
|                                 | Abbreviated DAPT (n=848) | Non-abbreviated DAPT (n=818) | P value | Abbreviated DAPT (n=1447) | Non-abbreviated DAPT (n=1466) | P value |
| Acenocoumarol                   | 135/835 (16.2%)          | 133/807 (16.5%)              | 0.89    | 3/1427 (0.2%)             | 0/1447 (0.0%)                 | 0.12    |
| Phenprocoumon                   | 26/835 (3.1%)            | 34/807 (4.2%)                | 0.24    | 1/1427 (0.1%)             | 0/1447 (0.0%)                 | 0.50    |
| Fluindione                      | 29/835 (3.5%)            | 22/807 (2.7%)                | 0.40    | 1/1427 (0.1%)             | 1/1447 (0.1%)                 | 1.00    |
| NOAC                            | 543/835 (65.0%)          | 534/807 (66.2%)              | 0.64    | 17/1427 (1.2%)            | 9/1447 (0.6%)                 | 0.12    |
| Dabigatran                      | 109/835 (13.1%)          | 98/807 (12.1%)               | 0.60    | 2/1427 (0.1%)             | 0/1447 (0.0%)                 | 0.25    |
| Apixaban                        | 222/835 (26.6%)          | 206/807 (25.5%)              | 0.65    | 4/1427 (0.3%)             | 4/1447 (0.3%)                 | 1.00    |
| Rivaroxaban                     | 176/835 (21.1%)          | 197/807 (24.4%)              | 0.11    | 11/1427 (0.8%)            | 5/1447 (0.3%)                 | 0.14    |
| Edoxaban                        | 36/835 (4.3%)            | 33/807 (4.1%)                | 0.90    | 0/1427 (0.0%)             | 0/1447 (0.0%)                 | –       |
| Calcium channel blocker         | 254/835 (30.4%)          | 216/807 (26.8%)              | 0.11    | 416/1426 (29.2%)          | 445/1447 (30.8%)              | 0.37    |
| Proton pump inhibitor           | 577/835 (69.1%)          | 588/807 (72.9%)              | 0.10    | 947/1426 (66.4%)          | 1014/1447 (70.1%)             | 0.037   |
| Beta-blocker                    | 669/835 (80.1%)          | 624/807 (77.3%)              | 0.18    | 980/1426 (68.7%)          | 987/1447 (68.2%)              | 0.78    |
| ACE inhibitor                   | 405/835 (48.5%)          | 379/807 (47.0%)              | 0.55    | 636/1426 (44.6%)          | 660/1447 (45.6%)              | 0.60    |
| Angiotensin II receptor blocker | 235/835 (28.1%)          | 234/807 (29.0%)              | 0.70    | 395/1426 (27.7%)          | 404/1447 (27.9%)              | 0.90    |
| H <sub>2</sub> blockers         | 15/835 (1.8%)            | 16/807 (2.0%)                | 0.86    | 25/1426 (1.8%)            | 21/1447 (1.5%)                | 0.55    |
| Insulin                         | 84/835 (10.1%)           | 61/807 (7.6%)                | 0.082   | 138/1426 (9.7%)           | 124/1447 (8.6%)               | 0.33    |
| Oral hypoglycemic agent         | 209/835 (25.0%)          | 210/807 (26.0%)              | 0.65    | 343/1426 (24.1%)          | 357/1447 (24.7%)              | 0.73    |
| Statin                          | 700/835 (83.8%)          | 661/807 (81.9%)              | 0.33    | 1255/1426 (88.0%)         | 1286/1447 (88.9%)             | 0.48    |
| Other lipid-lowering drug       | 83/835 (9.9%)            | 70/807 (8.7%)                | 0.40    | 122/1426 (8.6%)           | 127/1447 (8.8%)               | 0.84    |
| PCSK9 inhibitor                 | 2/835 (0.2%)             | 1/807 (0.1%)                 | 1.00    | 6/1426 (0.4%)             | 1/1447 (0.1%)                 | 0.07    |
| Sacubitril+valsartan            | 15/835 (1.8%)            | 21/807 (2.6%)                | 0.31    | 10/1426 (0.7%)            | 14/1447 (1.0%)                | 0.54    |
| Amiodarone                      | 119/835 (14.3%)          | 98/807 (12.1%)               | 0.22    | 19/1426 (1.3%)            | 24/1447 (1.7%)                | 0.54    |
| Ivabradine                      | 5/835 (0.6%)             | 5/807 (0.6%)                 | 1.00    | 14/1426 (1.0%)            | 22/1447 (1.5%)                | 0.24    |
| Nitrate                         | 107/835 (12.8%)          | 97/807 (12.0%)               | 0.65    | 229/1426 (16.1%)          | 218/1447 (15.1%)              | 0.47    |
| Diuretic                        | 402/835 (48.1%)          | 405/807 (50.2%)              | 0.43    | 468/1426 (32.8%)          | 469/1447 (32.4%)              | 0.84    |

|                                      | Indication for OAC       |                              |         | No indication for OAC     |                               |         |
|--------------------------------------|--------------------------|------------------------------|---------|---------------------------|-------------------------------|---------|
|                                      | Abbreviated DAPT (n=848) | Non-abbreviated DAPT (n=818) | P value | Abbreviated DAPT (n=1447) | Non-abbreviated DAPT (n=1466) | P value |
| Spironolactone/esplerenone           | 102/835 (12.2%)          | 121/807 (15.0%)              | 0.11    | 131/1426 (9.2%)           | 132/1447 (9.1%)               | 1.00    |
| Steroid                              | 65/835 (7.8%)            | 70/807 (8.7%)                | 0.53    | 114/1426 (8.0%)           | 145/1447 (10.0%)              | 0.06    |
| Non-steroidal anti-inflammatory drug | 13/835 (1.6%)            | 13/807 (1.6%)                | 1.00    | 32/1426 (2.2%)            | 31/1447 (2.1%)                | 0.90    |
| <b>At 6-month visit</b>              |                          |                              |         |                           |                               |         |
| DAPT                                 | 8/823 (1.0%)             | 130/793 (16.4%)              | <0.001  | 62/1407 (4.4%)            | 1242/1427 (87.0%)             | <0.001  |
| SAPT                                 | 637/823 (77.4%)          | 644/793 (81.2%)              | 0.066   | 1336/1407 (95.0%)         | 182/1427 (12.8%)              | <0.001  |
| No APT                               | 178/823 (21.6%)          | 19/793 (2.4%)                | <0.001  | 9/1407 (0.6%)             | 3/1427 (0.2%)                 | 0.09    |
| Aspirin                              | 138/823 (16.8%)          | 301/793 (38.0%)              | <0.001  | 540/1407 (38.4%)          | 1392/1427 (97.5%)             | <0.001  |
| P2Y12 inhibitor                      | 515/823 (62.6%)          | 603/793 (76.0%)              | <0.001  | 920/1407 (65.4%)          | 1274/1427 (89.3%)             | <0.001  |
| Clopidogrel                          | 511/823 (62.1%)          | 601/793 (75.8%)              | <0.001  | 606/1407 (43.1%)          | 865/1427 (60.6%)              | <0.001  |
| Prasugrel                            | 0/823 (0.0%)             | 0/793 (0.0%)                 | –       | 27/1407 (1.9%)            | 53/1427 (3.7%)                | 0.004   |
| Ticagrelor                           | 4/823 (0.5%)             | 2/793 (0.3%)                 | 0.69    | 288/1407 (20.5%)          | 356/1427 (24.9%)              | 0.005   |
| (N)OAC                               | 811/823 (98.5%)          | 777/793 (98.0%)              | 0.45    | 36/1407 (2.6%)            | 16/1427 (1.1%)                | 0.005   |
| VKA                                  | 268/823 (32.6%)          | 251/793 (31.7%)              | 0.71    | 10/1407 (0.7%)            | 1/1427 (0.1%)                 | 0.006   |
| Warfarin                             | 88/823 (10.7%)           | 71/793 (9.0%)                | 0.24    | 3/1407 (0.2%)             | 1/1427 (0.1%)                 | 0.37    |
| Acenocoumarol                        | 131/823 (15.9%)          | 128/793 (16.1%)              | 0.95    | 4/1407 (0.3%)             | 0/1427 (0.0%)                 | 0.06    |
| Phenprocoumon                        | 24/823 (2.9%)            | 31/793 (3.9%)                | 0.28    | 2/1407 (0.1%)             | 0/1427 (0.0%)                 | 0.25    |
| Fluindione                           | 25/823 (3.0%)            | 21/793 (2.6%)                | 0.66    | 1/1407 (0.1%)             | 0/1427 (0.0%)                 | 0.50    |
| NOAC                                 | 543/823 (66.0%)          | 526/793 (66.3%)              | 0.92    | 26/1407 (1.8%)            | 15/1427 (1.1%)                | 0.08    |
| Dabigatran                           | 111/823 (13.5%)          | 98/793 (12.4%)               | 0.51    | 2/1407 (0.1%)             | 3/1427 (0.2%)                 | 1.00    |
| Apixaban                             | 222/823 (27.0%)          | 205/793 (25.9%)              | 0.61    | 10/1407 (0.7%)            | 7/1427 (0.5%)                 | 0.48    |
| Rivaroxaban                          | 172/823 (20.9%)          | 191/793 (24.1%)              | 0.14    | 14/1407 (1.0%)            | 4/1427 (0.3%)                 | 0.018   |
| Edoxaban                             | 38/823 (4.6%)            | 32/793 (4.0%)                | 0.63    | 0/1407 (0.0%)             | 1/1427 (0.1%)                 | 1.00    |
| Calcium channel blocker              | 242/823 (29.4%)          | 225/793 (28.4%)              | 0.66    | 430/1406 (30.6%)          | 445/1427 (31.2%)              | 0.75    |

|                                      | Indication for OAC       |                              |         | No indication for OAC     |                               |         |
|--------------------------------------|--------------------------|------------------------------|---------|---------------------------|-------------------------------|---------|
|                                      | Abbreviated DAPT (n=848) | Non-abbreviated DAPT (n=818) | P value | Abbreviated DAPT (n=1447) | Non-abbreviated DAPT (n=1466) | P value |
| Proton pump inhibitor                | 550/823 (66.8%)          | 568/793 (71.6%)              | 0.041   | 917/1406 (65.2%)          | 980/1427 (68.7%)              | 0.06    |
| Beta-blocker                         | 660/823 (80.2%)          | 603/793 (76.0%)              | 0.047   | 961/1406 (68.3%)          | 963/1427 (67.5%)              | 0.63    |
| ACE inhibitor                        | 399/823 (48.5%)          | 364/793 (45.9%)              | 0.32    | 610/1406 (43.4%)          | 628/1427 (44.0%)              | 0.76    |
| Angiotensin II receptor blocker      | 231/823 (28.1%)          | 231/793 (29.1%)              | 0.66    | 397/1406 (28.2%)          | 404/1427 (28.3%)              | 0.97    |
| H <sub>2</sub> blockers              | 15/823 (1.8%)            | 13/793 (1.6%)                | 0.85    | 17/1406 (1.2%)            | 30/1427 (2.1%)                | 0.08    |
| Insulin                              | 81/823 (9.8%)            | 61/793 (7.7%)                | 0.14    | 132/1406 (9.4%)           | 124/1427 (8.7%)               | 0.56    |
| Oral hypoglycemic drug               | 204/823 (24.8%)          | 205/793 (25.9%)              | 0.65    | 348/1406 (24.8%)          | 353/1427 (24.7%)              | 1.00    |
| Statin                               | 697/823 (84.7%)          | 653/793 (82.3%)              | 0.23    | 1220/1406 (86.8%)         | 1260/1427 (88.3%)             | 0.23    |
| Other lipid-lowering drug            | 92/823 (11.2%)           | 77/793 (9.7%)                | 0.37    | 122/1406 (8.7%)           | 133/1427 (9.3%)               | 0.56    |
| PCSK9 inhibitor                      | 7/823 (0.9%)             | 0/793 (0.0%)                 | 0.016   | 4/1406 (0.3%)             | 1/1427 (0.1%)                 | 0.22    |
| Sacubitril+valsartan                 | 19/823 (2.3%)            | 20/793 (2.5%)                | 0.87    | 12/1406 (0.9%)            | 15/1427 (1.1%)                | 0.70    |
| Amiodarone                           | 109/823 (13.2%)          | 102/793 (12.9%)              | 0.83    | 26/1406 (1.8%)            | 24/1427 (1.7%)                | 0.78    |
| Ivabradine                           | 5/823 (0.6%)             | 7/793 (0.9%)                 | 0.57    | 14/1406 (1.0%)            | 20/1427 (1.4%)                | 0.39    |
| Nitrate                              | 104/823 (12.6%)          | 93/793 (11.7%)               | 0.60    | 207/1406 (14.7%)          | 204/1427 (14.3%)              | 0.75    |
| Diuretic                             | 392/823 (47.6%)          | 393/793 (49.6%)              | 0.46    | 481/1406 (34.2%)          | 479/1427 (33.6%)              | 0.72    |
| Spirolactone/esplerenone             | 113/823 (13.7%)          | 119/793 (15.0%)              | 0.48    | 132/1406 (9.4%)           | 127/1427 (8.9%)               | 0.70    |
| Steroids                             | 62/823 (7.5%)            | 57/793 (7.2%)                | 0.85    | 116/1406 (8.3%)           | 140/1427 (9.8%)               | 0.15    |
| Non-steroidal anti-inflammatory drug | 8/823 (1.0%)             | 13/793 (1.6%)                | 0.28    | 38/1406 (2.7%)            | 33/1427 (2.3%)                | 0.55    |
| <b>At 12-month visit*</b>            |                          |                              |         |                           |                               |         |
| DAPT                                 | 8/800 (1.0%)             | 51/766 (6.7%)                | <0.001  | 93/1385 (6.7%)            | 719/1401 (51.3%)              | <0.001  |
| SAPT                                 | 129/800 (16.1%)          | 524/766 (68.4%)              | <0.001  | 1243/1385 (89.7%)         | 661/1401 (47.2%)              | <0.001  |
| No APT                               | 663/800 (82.9%)          | 191/766 (24.9%)              | <0.001  | 49/1385 (3.5%)            | 21/1401 (1.5%)                | 0.001   |
| Aspirin                              | 63/800 (7.9%)            | 233/766 (30.4%)              | <0.001  | 649/1385 (46.9%)          | 1313/1401 (93.7%)             | <0.001  |

|                                 | Indication for OAC       |                              |         | No indication for OAC     |                               |         |
|---------------------------------|--------------------------|------------------------------|---------|---------------------------|-------------------------------|---------|
|                                 | Abbreviated DAPT (n=848) | Non-abbreviated DAPT (n=818) | P value | Abbreviated DAPT (n=1447) | Non-abbreviated DAPT (n=1466) | P value |
| P2Y12 inhibitor                 | 82/800 (10.3%)           | 393/766 (51.3%)              | <0.001  | 780/1385 (56.3%)          | 786/1401 (56.1%)              | 0.94    |
| Clopidogrel                     | 80/800 (10.0%)           | 391/766 (51.0%)              | <0.001  | 542/1385 (39.1%)          | 551/1401 (39.3%)              | 0.94    |
| Prasugrel                       | 0/800 (0.0%)             | 0/766 (0.0%)                 | –       | 27/1385 (1.9%)            | 22/1401 (1.6%)                | 0.47    |
| Ticagrelor                      | 2/800 (0.3%)             | 2/766 (0.3%)                 | 1.00    | 211/1385 (15.2%)          | 213/1401 (15.2%)              | 1.00    |
| (N)OAC                          | 784/800 (98.0%)          | 750/766 (97.9%)              | 1.00    | 52/1385 (3.8%)            | 40/1401 (2.9%)                | 0.20    |
| VKA                             | 253/800 (31.6%)          | 233/766 (30.4%)              | 0.62    | 11/1385 (0.8%)            | 6/1401 (0.4%)                 | 0.23    |
| Warfarin                        | 86/800 (10.8%)           | 69/766 (9.0%)                | 0.27    | 2/1385 (0.1%)             | 4/1401 (0.3%)                 | 0.69    |
| Acenocoumarol                   | 122/800 (15.3%)          | 116/766 (15.1%)              | 1.00    | 5/1385 (0.4%)             | 1/1401 (0.1%)                 | 0.12    |
| Phenprocoumon                   | 20/800 (2.5%)            | 27/766 (3.5%)                | 0.24    | 3/1385 (0.2%)             | 1/1401 (0.1%)                 | 0.37    |
| Fluindione                      | 25/800 (3.1%)            | 21/766 (2.7%)                | 0.77    | 1/1385 (0.1%)             | 0/1401 (0.0%)                 | 0.50    |
| NOAC                            | 531/800 (66.4%)          | 517/766 (67.5%)              | 0.67    | 41/1385 (3.0%)            | 34/1401 (2.4%)                | 0.41    |
| Dabigatran                      | 106/800 (13.3%)          | 96/766 (12.5%)               | 0.71    | 2/1385 (0.1%)             | 2/1401 (0.1%)                 | 1.00    |
| Apixaban                        | 212/800 (26.5%)          | 202/766 (26.4%)              | 0.95    | 18/1385 (1.3%)            | 16/1401 (1.1%)                | 0.73    |
| Rivaroxaban                     | 174/800 (21.8%)          | 188/766 (24.5%)              | 0.21    | 18/1385 (1.3%)            | 12/1401 (0.9%)                | 0.28    |
| Edoxaban                        | 39/800 (4.9%)            | 31/766 (4.0%)                | 0.46    | 3/1385 (0.2%)             | 4/1401 (0.3%)                 | 1.00    |
| Calcium channel blocker         | 229/800 (28.6%)          | 215/766 (28.1%)              | 0.82    | 427/1384 (30.9%)          | 437/1401 (31.2%)              | 0.87    |
| Proton pump inhibitor           | 513/800 (64.1%)          | 534/766 (69.7%)              | 0.021   | 893/1384 (64.5%)          | 926/1400 (66.1%)              | 0.38    |
| Beta-blocker                    | 625/800 (78.1%)          | 576/766 (75.2%)              | 0.19    | 928/1384 (67.1%)          | 932/1401 (66.5%)              | 0.78    |
| ACE inhibitor                   | 366/799 (45.8%)          | 358/766 (46.7%)              | 0.72    | 576/1384 (41.6%)          | 596/1401 (42.5%)              | 0.65    |
| Angiotensin II receptor blocker | 239/800 (29.9%)          | 213/766 (27.8%)              | 0.37    | 392/1384 (28.3%)          | 397/1401 (28.3%)              | 1.00    |
| H <sub>2</sub> blockers         | 14/800 (1.8%)            | 12/766 (1.6%)                | 0.85    | 17/1384 (1.2%)            | 23/1401 (1.6%)                | 0.43    |
| Insulin                         | 79/800 (9.9%)            | 58/766 (7.6%)                | 0.11    | 131/1384 (9.5%)           | 117/1401 (8.4%)               | 0.32    |
| Oral hypoglycemic drug          | 200/800 (25.0%)          | 201/766 (26.2%)              | 0.60    | 339/1384 (24.5%)          | 352/1401 (25.1%)              | 0.73    |
| Statin                          | 669/800 (83.6%)          | 645/766 (84.2%)              | 0.78    | 1200/1384 (86.7%)         | 1226/1401 (87.5%)             | 0.53    |

|                                      | Indication for OAC       |                              |         | No indication for OAC     |                               |         |
|--------------------------------------|--------------------------|------------------------------|---------|---------------------------|-------------------------------|---------|
|                                      | Abbreviated DAPT (n=848) | Non-abbreviated DAPT (n=818) | P value | Abbreviated DAPT (n=1447) | Non-abbreviated DAPT (n=1466) | P value |
| Other lipid-lowering drug            | 105/800 (13.1%)          | 92/766 (12.0%)               | 0.54    | 143/1384 (10.3%)          | 157/1401 (11.2%)              | 0.46    |
| PCSK9 inhibitor                      | 5/800 (0.6%)             | 2/766 (0.3%)                 | 0.45    | 1/1384 (0.1%)             | 3/1401 (0.2%)                 | 0.63    |
| Sacubitril+valsartan                 | 24/800 (3.0%)            | 22/766 (2.9%)                | 1.00    | 15/1384 (1.1%)            | 13/1401 (0.9%)                | 0.71    |
| Amiodarone                           | 103/800 (12.9%)          | 96/766 (12.5%)               | 0.88    | 22/1384 (1.6%)            | 24/1401 (1.7%)                | 0.88    |
| Ivabradine                           | 5/800 (0.6%)             | 6/766 (0.8%)                 | 0.77    | 12/1384 (0.9%)            | 18/1401 (1.3%)                | 0.36    |
| Nitrate                              | 111/800 (13.9%)          | 100/766 (13.1%)              | 0.66    | 216/1384 (15.6%)          | 207/1401 (14.8%)              | 0.56    |
| Diuretic                             | 379/800 (47.4%)          | 381/766 (49.7%)              | 0.36    | 464/1384 (33.5%)          | 472/1401 (33.7%)              | 0.94    |
| Spirolactone/esplerenone             | 117/800 (14.6%)          | 126/766 (16.4%)              | 0.33    | 138/1384 (10.0%)          | 127/1401 (9.1%)               | 0.44    |
| Steroids                             | 55/799 (6.9%)            | 66/766 (8.6%)                | 0.22    | 114/1384 (8.2%)           | 127/1401 (9.1%)               | 0.46    |
| Non-steroidal anti-inflammatory drug | 9/800 (1.1%)             | 10/766 (1.3%)                | 0.82    | 34/1384 (2.5%)            | 42/1401 (3.0%)                | 0.42    |

Data are n (%) or n/N (%).

ACE, angiotensin-converting enzyme; APT, antiplatelet treatment; DAPT, dual antiplatelet treatment; NOAC, non-vitamin K antagonist oral anticoagulant; OAC, oral anticoagulation; PCSK9, proprotein convertase subtilisin/kexin type 9; SAPT, single antiplatelet treatment; VKA, vitamin K antagonist.

\*Patients switched to routine care at around the 12-month visit after the qualifying PCI; switching was allowed inside a 14-day window.

**Table V. Dual and single antiplatelet therapy according to presence or absence of clinical indication for OAC**

|                                                | Indication for OAC       |                              |         | No indication for OAC     |                               |         |
|------------------------------------------------|--------------------------|------------------------------|---------|---------------------------|-------------------------------|---------|
|                                                | Abbreviated DAPT (n=848) | Non-abbreviated DAPT (n=818) | P value | Abbreviated DAPT (n=1447) | Non-abbreviated DAPT (n=1466) | P value |
| <b>At 1-month visit (before randomization)</b> |                          |                              |         |                           |                               |         |
| DAPT                                           | 835 (98.5%)              | 806 (98.5%)                  | 1.00    | 1446 (99.9%)              | 1466 (100.0%)                 | 0.50    |
| Clopidogrel                                    | 827 (97.5%)              | 804 (98.3%)                  | 0.31    | 990 (68.4%)               | 989 (67.5%)                   | 0.61    |
| Prasugrel                                      | 0 (0.0%)                 | 0 (0.0%)                     | –       | 59 (4.1%)                 | 56 (3.8%)                     | 0.78    |
| Ticagrelor                                     | 8 (0.9%)                 | 2 (0.2%)                     | 0.11    | 397 (27.4%)               | 421 (28.7%)                   | 0.46    |
| SAPT                                           | 13 (1.5%)                | 12 (1.5%)                    | 1.00    | 1 (0.1%)                  | 0 (0.0%)                      | 0.50    |
| Acetylsalicylic acid                           | 2 (0.2%)                 | 1 (0.1%)                     | 1.00    | 1 (0.1%)                  | 0 (0.0%)                      | 0.50    |
| Clopidogrel                                    | 11 (1.3%)                | 11 (1.3%)                    | 1.00    | 0 (0.0%)                  | 0 (0.0%)                      | –       |
| Prasugrel                                      | 0 (0.0%)                 | 0 (0.0%)                     | –       | 0 (0.0%)                  | 0 (0.0%)                      | –       |
| Ticagrelor                                     | 0 (0.0%)                 | 0 (0.0%)                     | –       | 0 (0.0%)                  | 0 (0.0%)                      | –       |
| <b>At 1-month visit (after randomization)</b>  |                          |                              |         |                           |                               |         |
| DAPT                                           | 19 (2.2%)                | 806 (98.5%)                  | <0.001  | 33 (2.3%)                 | 1466 (100.0%)                 | <0.001  |
| Clopidogrel                                    | 19 (2.2%)                | 804 (98.3%)                  | <0.001  | 20 (1.4%)                 | 994 (67.8%)                   | <0.001  |
| Prasugrel                                      | 0 (0.0%)                 | 0 (0.0%)                     | –       | 1 (0.1%)                  | 55 (3.8%)                     | <0.001  |
| Ticagrelor                                     | 0 (0.0%)                 | 2 (0.2%)                     | 0.24    | 12 (0.8%)                 | 417 (28.4%)                   | <0.001  |
| SAPT                                           | 826 (97.4%)              | 9 (1.1%)                     | <0.001  | 1408 (97.3%)              | 0 (0.0%)                      | <0.001  |
| Acetylsalicylic acid                           | 165 (19.5%)              | 1 (0.1%)                     | <0.001  | 495 (34.2%)               | 0 (0.0%)                      | <0.001  |
| Clopidogrel                                    | 656 (77.4%)              | 8 (1.0%)                     | <0.001  | 580 (40.1%)               | 0 (0.0%)                      | <0.001  |
| Prasugrel                                      | 0 (0.0%)                 | 0 (0.0%)                     | –       | 27 (1.9%)                 | 0 (0.0%)                      | <0.001  |
| Ticagrelor                                     | 5 (0.6%)                 | 0 (0.0%)                     | 0.062   | 306 (21.1%)               | 0 (0.0%)                      | <0.001  |
| <b>At 3-month visit</b>                        |                          |                              |         |                           |                               |         |
| DAPT                                           | 16/835 (1.9%)            | 522/807 (64.7%)              | <0.001  | 55/1427 (3.9%)            | 1415/1447 (97.8%)             | <0.001  |
| Clopidogrel                                    | 16/835 (1.9%)            | 521/807 (64.6%)              | <0.001  | 40/1427 (2.8%)            | 966/1447 (66.8%)              | <0.001  |
| Prasugrel                                      | 0/835 (0.0%)             | 0/807 (0.0%)                 | –       | 1/1427 (0.1%)             | 56/1447 (3.9%)                | <0.001  |
| Ticagrelor                                     | 0/835 (0.0%)             | 1/807 (0.1%)                 | 0.49    | 14/1427 (1.0%)            | 393/1447 (27.2%)              | <0.001  |
| SAPT                                           | 811/835 (97.1%)          | 279/807 (34.6%)              | <0.001  | 1369/1427 (95.9%)         | 31/1447 (2.1%)                | <0.001  |
| Acetylsalicylic acid                           | 164/835 (19.6%)          | 70/807 (8.7%)                | <0.001  | 481/1427 (33.7%)          | 18/1447 (1.2%)                | <0.001  |
| Clopidogrel                                    | 641/835 (76.8%)          | 209/807 (25.9%)              | <0.001  | 577/1427 (40.4%)          | 11/1447 (0.8%)                | <0.001  |

|                           | Indication for OAC       |                              |         | No indication for OAC     |                               |         |
|---------------------------|--------------------------|------------------------------|---------|---------------------------|-------------------------------|---------|
|                           | Abbreviated DAPT (n=848) | Non-abbreviated DAPT (n=818) | P value | Abbreviated DAPT (n=1447) | Non-abbreviated DAPT (n=1466) | P value |
| Prasugrel                 | 0/835 (0.0%)             | 0/807 (0.0%)                 | –       | 25/1427 (1.8%)            | 0/1447 (0.0%)                 | <0.001  |
| Ticagrelor                | 6/835 (0.7%)             | 0/807 (0.0%)                 | 0.031   | 287/1427 (20.1%)          | 2/1447 (0.1%)                 | <0.001  |
| <b>At 6-month visit</b>   |                          |                              |         |                           |                               |         |
| DAPT                      | 8/823 (1.0%)             | 130/793 (16.4%)              | <0.001  | 62/1407 (4.4%)            | 1242/1427 (87.0%)             | <0.001  |
| Clopidogrel               | 8/823 (1.0%)             | 129/793 (16.3%)              | <0.001  | 50/1407 (3.6%)            | 838/1427 (58.7%)              | <0.001  |
| Prasugrel                 | 0/823 (0.0%)             | 0/793 (0.0%)                 | –       | 0/1407 (0.0%)             | 53/1427 (3.7%)                | <0.001  |
| Ticagrelor                | 0/823 (0.0%)             | 1/793 (0.1%)                 | 0.49    | 12/1407 (0.9%)            | 351/1427 (24.6%)              | <0.001  |
| SAPT                      | 637/823 (77.4%)          | 644/793 (81.2%)              | 0.066   | 1336/1407 (95.0%)         | 182/1427 (12.8%)              | <0.001  |
| Acetylsalicylic acid      | 130/823 (15.8%)          | 171/793 (21.6%)              | 0.003   | 478/1407 (34.0%)          | 150/1427 (10.5%)              | <0.001  |
| Clopidogrel               | 503/823 (61.1%)          | 472/793 (59.5%)              | 0.54    | 556/1407 (39.5%)          | 27/1427 (1.9%)                | <0.001  |
| Prasugrel                 | 0/823 (0.0%)             | 0/793 (0.0%)                 | –       | 27/1407 (1.9%)            | 0/1427 (0.0%)                 | <0.001  |
| Ticagrelor                | 4/823 (0.5%)             | 1/793 (0.1%)                 | 0.38    | 276/1407 (19.6%)          | 5/1427 (0.4%)                 | <0.001  |
| <b>At 12-month visit*</b> |                          |                              |         |                           |                               |         |
| DAPT                      | 8/800 (1.0%)             | 51/766 (6.7%)                | <0.001  | 93/1385 (6.7%)            | 719/1401 (51.3%)              | <0.001  |
| Clopidogrel               | 6/800 (0.8%)             | 49/766 (6.4%)                | <0.001  | 73/1385 (5.3%)            | 489/1401 (34.9%)              | <0.001  |
| Prasugrel                 | 0/800 (0.0%)             | 0/766 (0.0%)                 | –       | 1/1385 (0.1%)             | 22/1401 (1.6%)                | <0.001  |
| Ticagrelor                | 2/800 (0.3%)             | 2/766 (0.3%)                 | 1.00    | 19/1385 (1.4%)            | 208/1401 (14.8%)              | <0.001  |
| SAPT                      | 129/800 (16.1%)          | 524/766 (68.4%)              | <0.001  | 1243/1385 (89.7%)         | 661/1401 (47.2%)              | <0.001  |
| Acetylsalicylic acid      | 55/800 (6.9%)            | 182/766 (23.8%)              | <0.001  | 556/1385 (40.1%)          | 594/1401 (42.4%)              | 0.23    |
| Clopidogrel               | 74/800 (9.3%)            | 342/766 (44.6%)              | <0.001  | 469/1385 (33.9%)          | 62/1401 (4.4%)                | <0.001  |
| Prasugrel                 | 0/800 (0.0%)             | 0/766 (0.0%)                 | –       | 26/1385 (1.9%)            | 0/1401 (0.0%)                 | <0.001  |
| Ticagrelor                | 0/800 (0.0%)             | 0/766 (0.0%)                 | –       | 192/1385 (13.9%)          | 5/1401 (0.4%)                 | <0.001  |

Data are n (%) or n/n (%).

DAPT, dual antiplatelet treatment; OAC, oral anticoagulation; SAPT, single antiplatelet treatment.

\*Patients switched to routine care at around the 12-month visit after the qualifying PCI; switching was allowed inside a 14-day window.



**Table VI. Reasonable\* and perfect† adherence according to presence or absence of clinical indication for OAC**

|                                                 | Indication for OAC          |                                 |                | No indication for OAC        |                                  |                |
|-------------------------------------------------|-----------------------------|---------------------------------|----------------|------------------------------|----------------------------------|----------------|
|                                                 | Abbreviated DAPT<br>(n=848) | Non-abbreviated<br>DAPT (n=818) | <i>P</i> value | Abbreviated DAPT<br>(n=1447) | Non-abbreviated<br>DAPT (n=1466) | <i>P</i> value |
| At 3-month visit (60 days post-randomization)   |                             |                                 |                |                              |                                  |                |
| Reasonable adherence                            | 820 (96.7%)                 | 784 (95.8%)                     | 0.37           | 1383 (95.6%)                 | 1452 (99.0%)                     | <0.001         |
| Perfect adherence                               | 813 (95.9%)                 | 770 (94.1%)                     | 0.12           | 1367 (94.5%)                 | 1441 (98.3%)                     | <0.001         |
| At 6-month visit (150 days post-randomization)  |                             |                                 |                |                              |                                  |                |
| Reasonable adherence                            | 814 (96.0%)                 | 790 (96.6%)                     | 0.61           | 1362 (94.1%)                 | 1446 (98.6%)                     | <0.001         |
| Perfect adherence                               | 780 (92.0%)                 | 754 (92.2%)                     | 0.93           | 1326 (91.6%)                 | 1415 (96.5%)                     | <0.001         |
| At 12-month visit (335 days post-randomization) |                             |                                 |                |                              |                                  |                |
| Reasonable adherence                            | 701 (82.7%)                 | 784 (95.8%)                     | <0.001         | 1331 (92.0%)                 | 1442 (98.4%)                     | <0.001         |
| Perfect adherence                               | 618 (72.9%)                 | 699 (85.5%)                     | <0.001         | 1249 (86.3%)                 | 1392 (95.0%)                     | <0.001         |

\* Reasonable adherence: adherent  $\geq 80\%$  of the time (day 0 to *t* days since randomization).

† Perfect adherence: adherent 100% or if <100% with a maximum of 2 consecutive days non-adherence (day 0 to *t* days since randomization).

DAPT, dual antiplatelet treatment; OAC, oral anticoagulation.

**Table VII. Clinical outcomes using a landmark analysis at 150 days (6-month visit) according to presence or absence of clinical indication for OAC (per-protocol populations)**

|                                                                                                                    | Indication for OAC     |                               |                  |            |                       | No indication for OAC      |                                    |                  |            |                       |
|--------------------------------------------------------------------------------------------------------------------|------------------------|-------------------------------|------------------|------------|-----------------------|----------------------------|------------------------------------|------------------|------------|-----------------------|
|                                                                                                                    | Abbrev DAPT<br>(n=848) | Non-abbrev<br>DAPT<br>(n=818) | HR (95% CI)*     | P<br>value | P<br>interacti<br>on† | Abbrev<br>DAPT<br>(n=1447) | Non-<br>abbrev<br>DAPT<br>(n=1466) | HR (95% CI)*     | P<br>value | P<br>interaction<br>† |
| Copriary composite outcome<br>of all-cause death, myocardial<br>infarction, stroke, bleeding<br>BARC 3 or 5 (NACE) |                        |                               |                  |            | 0.85                  |                            |                                    |                  |            | 0.73                  |
| 0–150 days                                                                                                         | 33/802 (4.1%)          | 37/788 (4.7%)                 | 0.86 (0.54–1.38) | 0.54       |                       | 50/1402<br>(3.6%)          | 51/1442<br>(3.5%)                  | 1.01 (0.69–1.49) | 0.95       |                       |
| 151–335 days                                                                                                       | 31/768 (4.0%)          | 37/745 (5.0%)                 | 0.81 (0.50–1.30) | 0.39       |                       | 51/1346<br>(3.8%)          | 47/1389<br>(3.4%)                  | 1.12 (0.75–1.66) | 0.59       |                       |
| Copriary composite outcome<br>of all-cause death, myocardial<br>infarction, stroke (MACCE)                         |                        |                               |                  |            | 0.65                  |                            |                                    |                  |            | 0.90                  |
| 0–150 days                                                                                                         | 21/802 (2.6%)          | 21/788 (2.7%)                 | 0.98 (0.53–1.79) | 0.93       |                       | 41/1402<br>(2.9%)          | 39/1442<br>(2.7%)                  | 1.09 (0.70–1.69) | 0.71       |                       |
| 151–335 days                                                                                                       | 26/780 (3.3%)          | 31/761 (4.1%)                 | 0.81 (0.48–1.37) | 0.44       |                       | 45/1355<br>(3.3%)          | 41/1401<br>(2.9%)                  | 1.13 (0.74–1.73) | 0.57       |                       |
| Copriary composite outcome<br>of bleeding BARC 2, 3 or 5                                                           |                        |                               |                  |            | 0.67                  |                            |                                    |                  |            | 0.32                  |
| 0–150 days                                                                                                         | 54/802 (6.8%)          | 62/788 (7.9%)                 | 0.84 (0.58–1.21) | 0.34       |                       | 27/1402<br>(1.9%)          | 62/1442<br>(4.3%)                  | 0.44 (0.28–0.70) | <0.00<br>1 |                       |
| 151–335 days                                                                                                       | 27/737 (3.7%)          | 27/713 (3.8%)                 | 0.96 (0.56–1.64) | 0.89       |                       | 32/1353<br>(2.4%)          | 52/1359<br>(3.9%)                  | 0.61 (0.39–0.95) | 0.028      |                       |
| Bleeding BARC 3 or 5                                                                                               |                        |                               |                  |            | 0.446                 |                            |                                    |                  |            | 0.49                  |
| 0–150 days                                                                                                         | 14/802 (1.8%)          | 21/788 (2.7%)                 | 0.65 (0.33–1.27) | 0.21       |                       | 11/1402<br>(0.8%)          | 15/1442<br>(1.1%)                  | 0.75 (0.35–1.64) | 0.48       |                       |
| 151–335 days                                                                                                       | 12/775 (1.6%)          | 12/753 (1.6%)                 | 0.97 (0.44–2.16) | 0.95       |                       | 14/1368<br>(1.0%)          | 13/1405<br>(0.9%)                  | 1.10 (0.52–2.34) | 0.80       |                       |
| All-cause death                                                                                                    |                        |                               |                  |            | 0.32                  |                            |                                    |                  |            | 0.72                  |
| 0–150 days                                                                                                         | 14/802 (1.8%)          | 11/788 (1.4%)                 | 1.25 (0.57–2.74) | 0.59       |                       | 18/1402<br>(1.3%)          | 22/1442<br>(1.5%)                  | 0.84 (0.45–1.57) | 0.59       |                       |
| 151–335 days                                                                                                       | 16/787 (2.0%)          | 21/771 (2.7%)                 | 0.74 (0.39–1.42) | 0.37       |                       | 24/1378<br>(1.7%)          | 25/1418<br>(1.8%)                  | 0.98 (0.56–1.72) | 0.95       |                       |
| Cerebrovascular accident                                                                                           |                        |                               |                  |            | 0.82                  |                            |                                    |                  |            | 0.50                  |

|                           | Indication for OAC     |                               |                   |            |                       | No indication for OAC      |                                    |                       |            |                       |
|---------------------------|------------------------|-------------------------------|-------------------|------------|-----------------------|----------------------------|------------------------------------|-----------------------|------------|-----------------------|
|                           | Abbrev DAPT<br>(n=848) | Non-abbrev<br>DAPT<br>(n=818) | HR (95% CI)*      | P<br>value | P<br>interacti<br>on† | Abbrev<br>DAPT<br>(n=1447) | Non-<br>abbrev<br>DAPT<br>(n=1466) | HR (95% CI)*          | P<br>value | P<br>interaction<br>† |
| 0–150 days                | 1/802 (0.1%)           | 5/788 (0.6%)                  | 0.120 (0.02–1.67) | 0.14       |                       | 6/1402<br>(0.4%)           | 6/1442<br>(0.4%)                   | 1.03 (0.33–3.20)      | 0.96       |                       |
| 151–335 days              | 1/786 (0.1%)           | 7/766 (0.9%)                  | 0.14 (0.02–1.12)  | 0.064      |                       | 8/1373<br>(0.6%)           | 13/1413<br>(0.9%)                  | 0.63 (0.26–1.52)      | 0.30       |                       |
| Myocardial infarction     |                        |                               |                   |            | 0.63                  |                            |                                    |                       |            | 0.42                  |
| 0–150 days                | 6/802 (0.8%)           | 7/788 (0.9%)                  | 0.84 (0.28–2.49)  | 0.75       |                       | 20/1402<br>(1.4%)          | 17/1442<br>(1.2%)                  | 1.22 (0.64–2.32)      | 0.55       |                       |
| 151–335 days              | 12/781 (1.6%)          | 10/765 (1.3%)                 | 1.17 (0.51–2.72)  | 0.71       |                       | 21/1359<br>(1.6%)          | 12/1402<br>(0.9%)                  | 1.80 (0.89–3.66)      | 0.10       |                       |
| Definite stent thrombosis |                        |                               |                   | –          | –                     |                            |                                    |                       | –          | –                     |
| 0–150 days                | 0/802 (0.0%)           | 1/788 (0.1%)                  |                   |            |                       | 4/1402<br>(0.3%)           | 2/1442<br>(0.1%)                   | 2.07 (0.38–<br>11.28) | 0.40       |                       |
| 151–335 days              | 2/787 (0.3%)           | 2/770 (0.3%)                  | 0.97 (0.14–6.92)  | 0.98       |                       | 5/1374<br>(0.4%)           | 1/1416<br>(0.1%)                   | 5.14 (0.60–<br>43.96) | 0.14       |                       |

Data are n (%) unless otherwise specified (Kaplan-Meier estimate).

Abbrev, abbreviated; BARC, Bleeding Academic Research Consortium; CI, confidence interval; DAPT, dual antiplatelet treatment; HR, hazard ratio; MACCE, major adverse cardiac and cerebral events; NACE, net adverse clinical outcomes; OAC, oral anticoagulant.

\*HRs (95% CIs) from Cox's time-to-first event analyses, using a landmark analysis at 150 days post-randomization.

†Interaction P value for randomization (abbreviated vs non-abbreviated DAPT) x period (0 to 150 days vs 150 to 335 days) modifying effect.

**Table VIII. Clinical outcomes 11 months post-randomization (12-month follow-up) according to presence or absence of clinical indication for OAC (per-protocol population)**

|                                                                                                            | Indication for OAC     |                            |                   | Com-Nougue<br>P value | No indication for OAC      |                                |                   | Com-Nougue<br>P value | P <sub>interaction</sub> |
|------------------------------------------------------------------------------------------------------------|------------------------|----------------------------|-------------------|-----------------------|----------------------------|--------------------------------|-------------------|-----------------------|--------------------------|
|                                                                                                            | Abbrev DAPT<br>(n=802) | Non-abbrev<br>DAPT (n=788) | HR* (95% CI)      |                       | Abbrev<br>DAPT<br>(n=1402) | Non-abbrev<br>DAPT<br>(n=1442) | HR* (95% CI)      |                       |                          |
| Coprimary composite outcome of all-cause death, myocardial infarction, stroke, bleeding BARC 3 or 5 (NACE) | 64 (8.0%)              | 74 (9.5%)                  | 0.84 (0.60–1.17)  | 0.30                  | 101 (7.2%)                 | 98 (6.8%)                      | 1.06 (0.80–1.40)  | 0.66                  | 0.28                     |
| Coprimary composite outcome of all-cause death, myocardial infarction, stroke (MACCE)                      | 47 (5.9%)              | 52 (6.7%)                  | 0.88 (0.59–1.30)  | 0.52                  | 86 (6.2%)                  | 80 (5.56)                      | 1.11 (0.82–1.51)  | 0.50                  | 0.36                     |
| Coprimary composite outcome of bleeding BARC 2, 3 or 5                                                     | 81 (10.2%)             | 89 (11.4%)                 | 0.87 (0.65–1.18)  | 0.43                  | 59 (4.3%)                  | 114 (8.0%)                     | 0.52 (0.38–0.71)  | <0.001                | 0.020                    |
| Death                                                                                                      | 30 (3.8%)              | 32 (4.1%)                  | 0.92 (0.56–1.51)  | 0.72                  | 42 (3.0%)                  | 47 (3.3%)                      | 0.92 (0.61–1.39)  | 0.69                  | 0.99                     |
| Cardiovascular death                                                                                       | 15 (1.9%)              | 20 (2.6%)                  | 0.73 (0.37–1.43)  | 0.36                  | 21 (1.5%)                  | 23 (1.6%)                      | 0.94 (0.52–1.69)  | 0.84                  | 0.59                     |
| Non-cardiovascular death                                                                                   | 11 (1.4%)              | 7 (0.9%)                   | 1.53 (0.59–3.96)  | 0.37                  | 16 (1.2%)                  | 20 (1.4%)                      | 0.82 (0.43–1.58)  | 0.56                  | 0.29                     |
| Cerebrovascular accident                                                                                   | 2 (0.3%)               | 12 (1.6%)                  | 0.16 (0.04–0.72)  | 0.007                 | 14 (1.0%)                  | 19 (1.3%)                      | 0.76 (0.38–1.51)  | 0.43                  | 0.067                    |
| Stroke                                                                                                     | 1 (0.1%)               | 9 (1.2%)                   | 0.11 (0.01–0.85)  | 0.010                 | 10 (0.7%)                  | 13 (0.9%)                      | 0.79 (0.35–1.80)  | 0.57                  | 0.079                    |
| Ischemic stroke                                                                                            | 1 (0.1%)               | 8 (1.0%)                   | 0.12 (0.02–0.97)  | 0.018                 | 9 (0.7%)                   | 9 (0.6%)                       | 1.03 (0.41–2.59)  | 0.96                  | 0.066                    |
| Hemorrhagic stroke                                                                                         | 0 (0.0%)               | 1 (0.1%)                   | 0.33 (0.01–8.09)  | 0.32                  | 1 (0.1%)                   | 3 (0.2%)                       | 0.34 (0.04–3.29)  | 0.33                  | 1.00                     |
| Transient ischemic attack                                                                                  | 1 (0.1%)               | 3 (0.4%)                   | 0.32 (0.03–3.12)  | 0.32                  | 4 (0.3%)                   | 6 (0.4%)                       | 0.68 (0.19–2.42)  | 0.57                  | 0.57                     |
| Myocardial infarction                                                                                      | 18 (2.3%)              | 17 (2.2%)                  | 1.03 (0.53–2.01)  | 0.91                  | 41 (3.0%)                  | 29 (2.0%)                      | 1.46 (0.91–2.35)  | 0.12                  | 0.41                     |
| Late definite or probable stent thrombosis                                                                 | 3 (0.4%)               | 4 (0.5%)                   | 0.73 (0.16–3.27)  | 0.68                  | 11 (0.8%)                  | 4 (0.3%)                       | 2.83 (0.90–8.90)  | 0.06                  | 0.16                     |
| Late definite stent thrombosis                                                                             | 2 (0.3%)               | 3 (0.4%)                   | 0.65 (0.11–3.89)  | 0.64                  | 9 (0.7%)                   | 3 (0.2%)                       | 3.09 (0.84–11.41) | 0.07                  | 0.17                     |
| Late probable stent thrombosis                                                                             | 1 (0.1%)               | 1 (0.1%)                   | 0.98 (0.06–15.61) | 0.99                  | 2 (0.1%)                   | 1 (0.1%)                       | 2.06 (0.19–22.72) | 0.54                  | 0.69                     |
| Bleeding BARC classification                                                                               |                        |                            |                   |                       |                            |                                |                   |                       |                          |
| Type 1                                                                                                     | 32 (4.1%)              | 42 (5.4%)                  | 0.74 (0.47–1.17)  | 0.20                  | 28 (2.0%)                  | 62 (4.4%)                      | 0.46 (0.29–0.72)  | <0.001                | 0.15                     |
| Type 2                                                                                                     | 58 (7.3%)              | 63 (8.1%)                  | 0.89 (0.62–1.27)  | 0.55                  | 39 (2.8%)                  | 87 (6.1%)                      | 0.45 (0.31–0.66)  | <0.001                | 0.011                    |
| Type 3                                                                                                     | 25 (3.2%)              | 30 (3.9%)                  | 0.81 (0.48–1.38)  | 0.45                  | 24 (1.7%)                  | 24 (1.7%)                      | 1.03 (0.58–1.81)  | 0.91                  | 0.55                     |
| Type 3a                                                                                                    | 11 (1.4%)              | 18 (2.3%)                  | 0.59 (0.28–1.26)  | 0.17                  | 13 (0.9%)                  | 10 (0.7%)                      | 1.33 (0.59–3.04)  | 0.48                  | 0.16                     |
| Type 3b                                                                                                    | 12 (1.5%)              | 10 (1.3%)                  | 1.17 (0.51–2.71)  | 0.70                  | 7 (0.5%)                   | 8 (0.6%)                       | 0.90 (0.33–2.48)  | 0.84                  | 0.69                     |

|             | Indication for OAC     |                            |                  | Com-Nougue<br>P value | No indication for OAC      |                                |                  | Com-Nougue<br>P value | p <sub>interaction</sub> |
|-------------|------------------------|----------------------------|------------------|-----------------------|----------------------------|--------------------------------|------------------|-----------------------|--------------------------|
|             | Abbrev DAPT<br>(n=802) | Non-abbrev<br>DAPT (n=788) | HR* (95% CI)     |                       | Abbrev<br>DAPT<br>(n=1402) | Non-abbrev<br>DAPT<br>(n=1442) | HR* (95% CI)     |                       |                          |
| Type 3c     | 3 (0.4%)               | 2 (0.3%)                   | 1.46 (0.24–8.77) | 0.65                  | 4 (0.3%)                   | 6 (0.4%)                       | 0.68 (0.19–2.43) | 0.55                  | 0.50                     |
| Type 4      | 0 (0.0%)               | 0 (0.0%)                   | –                |                       | 0 (0.0%)                   | 0 (0.0%)                       | –                |                       | –                        |
| Type 5      | 1 (0.1%)               | 3 (0.4%)                   | 0.33 (0.03–3.13) | 0.31                  | 1 (0.1%)                   | 4 (0.3%)                       | 0.26 (0.03–2.30) | 0.19                  | 0.88                     |
| Type 5a     | 0 (0.0%)               | 1 (0.1%)                   | 0.33 (0.01–8.09) | 0.32                  | 0 (0.0%)                   | 0 (0.0%)                       | –                | –                     | –                        |
| Type 5b     | 1 (0.1%)               | 2 (0.3%)                   | 0.49 (0.04–5.39) | 0.56                  | 1 (0.1%)                   | 4 (0.3%)                       | 0.26 (0.03–2.30) | 0.19                  | 0.70                     |
| Type 3 or 5 | 26 (3.3%)              | 33 (4.3%)                  | 0.77 (0.46–1.28) | 0.32                  | 25 (1.8%)                  | 28 (2.0%)                      | 0.92 (0.53–1.57) | 0.76                  | 0.64                     |

Data are n (%).

Abbrev, abbreviated; BARC, Bleeding Academic Research Consortium; CI, confidence interval; DAPT, dual antiplatelet treatment; HR, hazard ratio; MACCE, major adverse cardiac and cerebral events; NACE, net adverse clinical outcomes; OAC, oral anticoagulant.

\*HRs (95% CIs) from Cox's time-to-first event analyses.

**Table IX. Overview of protocol violations\* used to define the per-protocol population according to presence or absence of clinical indication for 12-month OAC**

|                                                                                                     | n/N (%)           |
|-----------------------------------------------------------------------------------------------------|-------------------|
| <b>Clinical indication for OAC</b>                                                                  |                   |
| Non-abbreviated DAPT                                                                                |                   |
| No protocol violation                                                                               | 788/818 (96.3%)   |
| Not on DAPT at randomization                                                                        | 6/818 (0.7%)      |
| Not on DAPT at randomization and not on protocol-mandated treatment within 14 days                  | 5/818 (0.6%)      |
| Not on protocol-mandated treatment within 14 days                                                   | 3/818 (0.4%)      |
| Received other stents (BMS/DES)                                                                     | 3/818 (0.4%)      |
| Treated ISR or stent thrombosis                                                                     | 11/818 (1.3%)     |
| Treated ISR or stent thrombosis and not on DAPT at randomization                                    | 1/818 (0.1%)      |
| Treated ISR or stent thrombosis and not treated with Ultimaster and received other stents (BMS/DES) | 1/818 (0.1%)      |
| Abbreviated DAPT                                                                                    |                   |
| No protocol violation                                                                               | 802/848 (94.6%)   |
| Not on DAPT at randomization                                                                        | 13/848 (1.5%)     |
| Not on protocol-mandated treatment within 14 days                                                   | 15/848 (1.8%)     |
| Not treated with Ultimaster and Received other stents (BMS or DES)                                  | 1/848 (0.1%)      |
| Received other stents (BMS or DES)                                                                  | 3/848 (0.4%)      |
| Treated ISR or stent thrombosis                                                                     | 14/848 (1.7%)     |
| <b>No clinical indication for OAC</b>                                                               |                   |
| Non-abbreviated DAPT                                                                                |                   |
| No protocol violation                                                                               | 1442/1466 (98.4%) |
| Not HBR                                                                                             | 1/1466 (0.1%)     |
| Received other stents (BMS or DES)                                                                  | 4/1466 (0.3%)     |
| Treated ISR or stent thrombosis                                                                     | 17/1466 (1.2%)    |
| Treated ISR or stent thrombosis and received other stents (BMS/DES)                                 | 2/1466 (0.1%)     |
| Abbreviated DAPT                                                                                    |                   |
| No protocol violation                                                                               | 1402/1447 (96.9%) |
| Not HBR                                                                                             | 3/1447 (0.2%)     |
| Not on DAPT at randomization                                                                        | 1/1447 (0.1%)     |
| Not on protocol-mandated treatment within 14 days                                                   | 28/1447 (1.9%)    |
| Received other stents (BMS or DES)                                                                  | 3/1447 (0.2%)     |
| Treated ISR or stent thrombosis                                                                     | 10/1447 (0.7%)    |

Data are n/n (%).

BMS, bare-metal stent; DAPT, dual antiplatelet therapy; DES, drug-eluting stent; HBR, high bleeding risk; ISR, in-stent restenosis; OAC, oral anticoagulation.

\*Protocol violation(s) counted per patient.

### Figure I. Adherence to allocated medication regimen for patients on oral anticoagulation therapy and antiplatelet therapy

(A) Oral anticoagulation subgroup, abbreviated DAPT arm; (B) oral anticoagulation subgroup, non-abbreviated DAPT arm; (C) antiplatelet subgroup, abbreviated DAPT arm; and (D) antiplatelet subgroup, non-abbreviated DAPT arm.

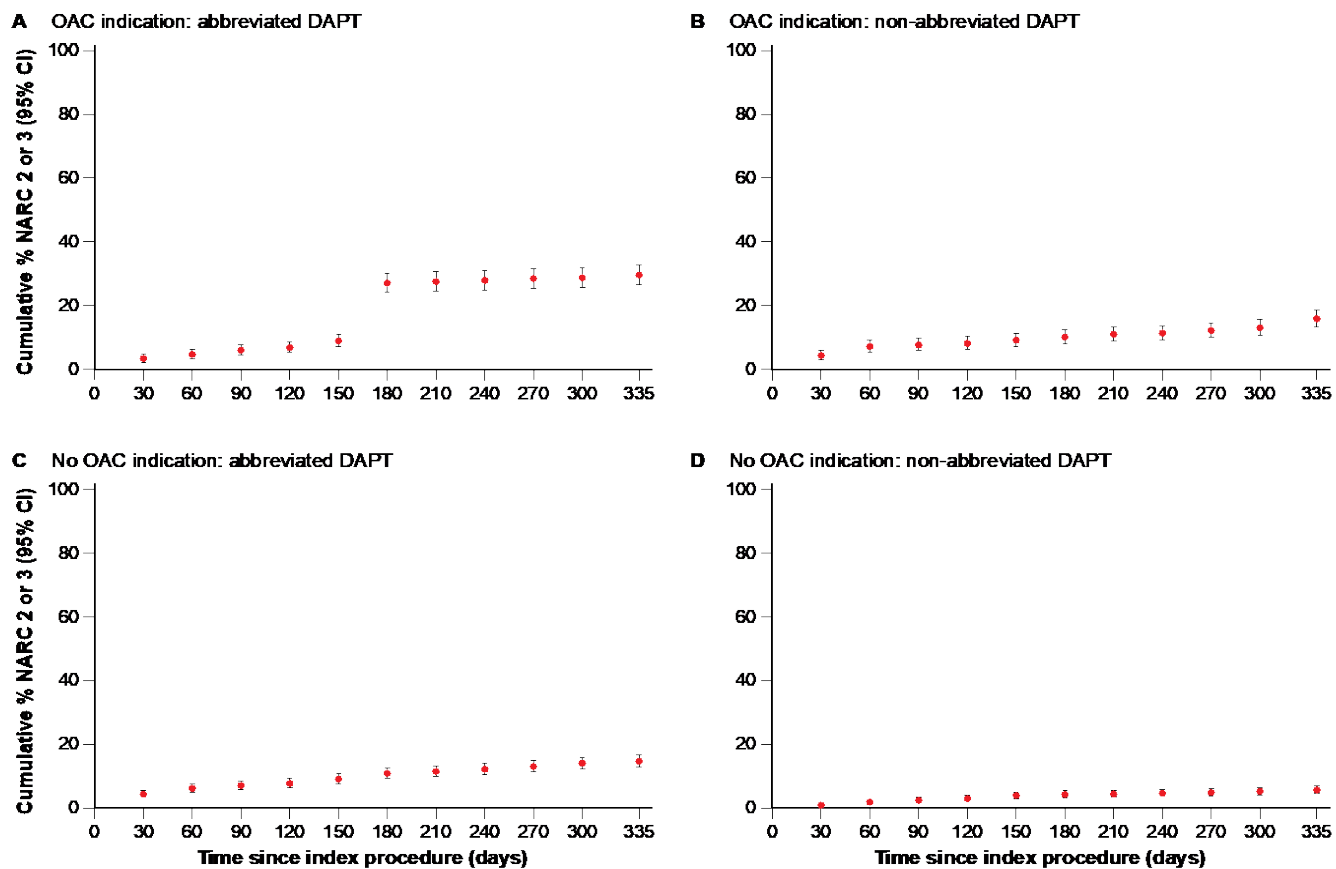

Supplement: cir-144-1196-s001.pdf [file cir-144-1196-s001.pdf]
